# Supplementary material for: To what extent do flood-inducing storm events change future flood hazards?
Source: Copernicus journal article supplement (doi:10.5194/hess-28-3161-2024), 2024-07-19
Supplement: Supplementary file 1 [file hess-28-3161-2024-supplement.pdf]

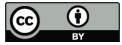

*Supplement of*

## **To what extent do flood-inducing storm events change future flood hazards?**

**Mariam Khanam et al.**

*Correspondence to:* Mariam Khanam ([mariam.khanam@uconn.edu](mailto:mariam.khanam@uconn.edu)) and Giulia Sofia ([giulia.sofia@uconn.edu](mailto:giulia.sofia@uconn.edu))

The copyright of individual parts of the supplement might differ from the article licence.

|    | Lat      | Lon      | statID  |
|----|----------|----------|---------|
| 1  | 46.70056 | -69.7156 | 1010000 |
| 2  | 47.11306 | -69.0881 | 1010500 |
| 3  | 46.77722 | -68.1572 | 1017000 |
| 4  | 45.50111 | -68.3058 | 1030500 |
| 5  | 45.26722 | -69.5839 | 1031300 |
| 6  | 45.175   | -69.3147 | 1031500 |
| 7  | 44.86917 | -69.955  | 1047000 |
| 8  | 44.70806 | -69.9375 | 1048000 |
| 9  | 44.47222 | -69.6839 | 1049265 |
| 10 | 44.43583 | -71.1903 | 1054000 |
| 11 | 44.55194 | -70.5442 | 1054500 |
| 12 | 44.64278 | -70.5889 | 1055000 |
| 13 | 44.07222 | -70.2081 | 1059000 |
| 14 | 43.99083 | -71.0906 | 1064500 |
| 15 | 43.10259 | -70.9526 | 1073500 |
| 16 | 43.97618 | -71.6795 | 1075000 |
| 17 | 43.79563 | -71.8454 | 1076000 |
| 18 | 43.75924 | -71.6856 | 1076500 |
| 19 | 43.56646 | -71.7479 | 1078000 |
| 20 | 43.42285 | -71.6529 | 1081500 |
| 21 | 42.86258 | -71.9592 | 1082000 |
| 22 | 43.25091 | -71.7323 | 1086000 |
| 23 | 43.21369 | -71.4803 | 1089100 |
| 24 | 42.84259 | -71.7067 | 1093852 |
| 25 | 42.85759 | -71.5062 | 1094000 |
| 26 | 42.5762  | -71.7881 | 1094400 |
| 27 | 42.43204 | -71.4498 | 1097000 |
| 28 | 42.32537 | -71.3976 | 1098530 |
| 29 | 42.56815 | -71.2148 | 1100600 |
| 30 | 42.1776  | -71.2009 | 1105000 |
| 31 | 41.84038 | -71.1428 | 1109070 |
| 32 | 41.99649 | -71.562  | 1111500 |
| 33 | 41.75093 | -71.4451 | 1116500 |
| 34 | 41.49816 | -71.7165 | 1118000 |
| 35 | 41.75065 | -72.2656 | 1119500 |
| 36 | 41.84371 | -72.169  | 1121000 |
| 37 | 41.55871 | -72.1215 | 1127500 |
| 38 | 44.74977 | -71.6312 | 1129500 |
| 39 | 44.41006 | -71.7206 | 1131500 |
| 40 | 44.63394 | -71.8976 | 1133000 |
| 41 | 44.36561 | -72.0393 | 1135500 |
| 42 | 44.26867 | -71.6304 | 1137500 |
| 43 | 44.15034 | -72.0651 | 1139000 |
| 44 | 43.93451 | -72.6579 | 1142500 |
| 45 | 43.71424 | -72.4181 | 1144000 |
| 46 | 43.38757 | -72.362  | 1152500 |
| 47 | 43.19174 | -72.4851 | 1153550 |
| 48 | 43.13758 | -72.4881 | 1154000 |
| 49 | 43.12619 | -72.4368 | 1154500 |

|    |          |          |         |
|----|----------|----------|---------|
| 50 | 42.63842 | -72.7251 | 1169000 |
| 51 | 42.53592 | -72.6534 | 1170000 |
| 52 | 42.31898 | -72.6651 | 1171500 |
| 53 | 42.23731 | -72.8957 | 1181000 |
| 54 | 42.10676 | -72.699  | 1183500 |
| 55 | 42.07886 | -73.0729 | 1185500 |
| 56 | 41.78621 | -72.9648 | 1188000 |
| 57 | 41.75555 | -72.887  | 1188090 |
| 58 | 41.78315 | -72.5873 | 1192500 |
| 59 | 41.45026 | -72.8413 | 1196500 |
| 60 | 42.46958 | -73.1973 | 1197000 |
| 61 | 42.23192 | -73.3547 | 1197500 |
| 62 | 41.65876 | -73.5287 | 1200000 |
| 63 | 41.48194 | -73.2246 | 1204000 |
| 64 | 41.4423  | -73.0623 | 1208500 |
| 65 | 43.96667 | -74.1317 | 1312000 |
| 66 | 43.70083 | -73.9833 | 1315500 |
| 67 | 43.31889 | -73.8442 | 1318500 |
| 68 | 43.35278 | -74.2703 | 1321000 |
| 69 | 43.10861 | -73.4217 | 1329490 |
| 70 | 42.70036 | -73.159  | 1332500 |
| 71 | 42.91286 | -73.2565 | 1334000 |
| 72 | 42.93861 | -73.3769 | 1334500 |
| 73 | 42.82917 | -73.6661 | 1335754 |
| 74 | 43.06889 | -74.9883 | 1346000 |
| 75 | 42.31944 | -74.4367 | 1350000 |
| 76 | 42.37694 | -74.4131 | 1350080 |
| 77 | 42.39722 | -74.4506 | 1350101 |
| 78 | 42.8     | -74.2628 | 1351500 |
| 79 | 42.78539 | -73.7078 | 1357500 |
| 80 | 42.01417 | -74.2706 | 1362500 |
| 81 | 42.03778 | -73.9719 | 1364500 |
| 82 | 41.84306 | -74.0861 | 1367500 |
| 83 | 41.68611 | -74.1653 | 1371500 |
| 84 | 41.65306 | -73.8725 | 1372500 |
| 85 | 40.99917 | -73.9892 | 1377000 |
| 86 | 41.03667 | -74.0392 | 1377370 |
| 87 | 40.99278 | -74.0211 | 1377500 |
| 88 | 40.94833 | -74.0267 | 1378500 |
| 89 | 40.68    | -74.5289 | 1379000 |
| 90 | 40.72611 | -74.3897 | 1379500 |
| 91 | 40.96    | -74.5397 | 1379773 |
| 92 | 40.89694 | -74.3947 | 1381000 |
| 93 | 40.80722 | -74.4569 | 1381500 |
| 94 | 40.845   | -74.3472 | 1381800 |
| 95 | 41.01833 | -74.4011 | 1382500 |
| 96 | 40.99861 | -74.2981 | 1382800 |
| 97 | 41.04417 | -74.2931 | 1387000 |
| 98 | 41.14028 | -74.1686 | 1387400 |
| 99 | 41.11833 | -74.1603 | 1387420 |

|     |          |          |         |
|-----|----------|----------|---------|
| 100 | 41.14111 | -74.1161 | 1387450 |
| 101 | 41.09806 | -74.1628 | 1387500 |
| 102 | 40.99194 | -74.28   | 1388000 |
| 103 | 40.96972 | -74.2819 | 1388500 |
| 104 | 40.88583 | -74.1283 | 1389890 |
| 105 | 41.05861 | -74.0956 | 1390450 |
| 106 | 40.99778 | -74.1119 | 1391000 |
| 107 | 40.89028 | -74.0806 | 1391500 |
| 108 | 40.6875  | -74.3117 | 1394500 |
| 109 | 40.61889 | -74.2833 | 1395000 |
| 110 | 40.67778 | -74.8792 | 1396500 |
| 111 | 40.69139 | -74.9369 | 1396582 |
| 112 | 40.6475  | -74.9689 | 1396660 |
| 113 | 40.64    | -74.9156 | 1396800 |
| 114 | 40.57222 | -74.8681 | 1397000 |
| 115 | 40.47333 | -74.8278 | 1398000 |
| 116 | 40.70833 | -74.6361 | 1398500 |
| 117 | 40.64944 | -74.6817 | 1399100 |
| 118 | 40.7275  | -74.7303 | 1399500 |
| 119 | 40.57056 | -74.6792 | 1400000 |
| 120 | 40.55556 | -74.5828 | 1400500 |
| 121 | 40.33306 | -74.6819 | 1401000 |
| 122 | 40.475   | -74.5758 | 1402000 |
| 123 | 40.55111 | -74.5483 | 1403060 |
| 124 | 40.61222 | -74.5908 | 1403150 |
| 125 | 40.66611 | -74.4039 | 1403400 |
| 126 | 40.63639 | -74.4514 | 1403540 |
| 127 | 40.585   | -74.5078 | 1403900 |
| 128 | 40.48306 | -74.4128 | 1405030 |
| 129 | 40.38944 | -74.3906 | 1405400 |
| 130 | 40.31972 | -74.1156 | 1407500 |
| 131 | 40.16139 | -74.1547 | 1408000 |
| 132 | 40.14667 | -74.1222 | 1408029 |
| 133 | 39.98639 | -74.2233 | 1408500 |
| 134 | 39.68806 | -74.5481 | 1409810 |
| 135 | 39.62306 | -74.4414 | 1410150 |
| 136 | 39.30694 | -74.8206 | 1411300 |
| 137 | 39.4725  | -75.2556 | 1412800 |
| 138 | 42.15083 | -74.6014 | 1413398 |
| 139 | 42.14667 | -74.6233 | 1413408 |
| 140 | 42.14472 | -74.6536 | 1413500 |
| 141 | 42.13306 | -74.6956 | 1414000 |
| 142 | 42.12    | -74.8186 | 1415000 |
| 143 | 41.94642 | -74.9797 | 1420500 |
| 144 | 41.97356 | -75.1752 | 1421000 |
| 145 | 42.36111 | -74.6622 | 1421618 |
| 146 | 42.28028 | -74.9072 | 1421900 |
| 147 | 42.16611 | -75.14   | 1423000 |
| 148 | 41.75675 | -75.0574 | 1427510 |
| 149 | 41.67453 | -75.376  | 1428750 |

|     |          |          |         |
|-----|----------|----------|---------|
| 150 | 41.60731 | -75.2671 | 1429500 |
| 151 | 41.4762  | -75.1721 | 1431500 |
| 152 | 41.66806 | -74.7806 | 1432900 |
| 153 | 41.37056 | -74.6975 | 1434000 |
| 154 | 41.63806 | -74.6169 | 1436690 |
| 155 | 41.44111 | -74.6019 | 1437500 |
| 156 | 41.30917 | -74.7953 | 1438500 |
| 157 | 41.08815 | -75.0377 | 1439500 |
| 158 | 41.08481 | -75.2146 | 1440400 |
| 159 | 40.99871 | -75.1427 | 1442500 |
| 160 | 40.98083 | -74.9533 | 1443500 |
| 161 | 40.98083 | -74.7764 | 1445000 |
| 162 | 40.83056 | -74.9778 | 1445500 |
| 163 | 40.84333 | -75.0464 | 1446000 |
| 164 | 41.10481 | -75.7321 | 1447800 |
| 165 | 40.82926 | -75.7052 | 1449000 |
| 166 | 40.84565 | -75.6457 | 1449800 |
| 167 | 40.75704 | -75.603  | 1451000 |
| 168 | 40.58232 | -75.483  | 1451500 |
| 169 | 40.62315 | -75.4824 | 1452000 |
| 170 | 40.61538 | -75.3788 | 1453000 |
| 171 | 40.66927 | -75.2363 | 1454700 |
| 172 | 40.67222 | -75.0608 | 1457000 |
| 173 | 40.22167 | -74.7781 | 1463500 |
| 174 | 40.26972 | -74.6719 | 1463620 |
| 175 | 40.22417 | -74.7492 | 1464000 |
| 176 | 40.13722 | -74.6    | 1464500 |
| 177 | 40.174   | -74.9568 | 1465500 |
| 178 | 39.94    | -74.7631 | 1465850 |
| 179 | 39.89528 | -74.8236 | 1465880 |
| 180 | 39.95611 | -74.6278 | 1466900 |
| 181 | 39.97    | -74.6844 | 1467000 |
| 182 | 40.05011 | -75.0327 | 1467048 |
| 183 | 40.01595 | -75.0968 | 1467087 |
| 184 | 39.90306 | -75.0214 | 1467150 |
| 185 | 40.62926 | -76.1247 | 1468500 |
| 186 | 40.52259 | -75.9983 | 1470500 |
| 187 | 40.36898 | -75.9791 | 1471000 |
| 188 | 40.24176 | -75.6516 | 1472000 |
| 189 | 40.22955 | -75.4516 | 1473000 |
| 190 | 39.96789 | -75.1885 | 1474500 |
| 191 | 39.869   | -75.4082 | 1477000 |
| 192 | 39.74056 | -75.2592 | 1477120 |
| 193 | 39.63739 | -75.7279 | 1478000 |
| 194 | 39.7475  | -75.7708 | 1478245 |
| 195 | 39.68922 | -75.7488 | 1478650 |
| 196 | 39.69922 | -75.675  | 1479000 |
| 197 | 39.76281 | -75.6365 | 1480000 |
| 198 | 39.71575 | -75.6399 | 1480015 |
| 199 | 39.98566 | -75.8274 | 1480500 |

|     |          |          |         |
|-----|----------|----------|---------|
| 200 | 39.96177 | -75.8013 | 1480617 |
| 201 | 39.96872 | -75.6733 | 1480870 |
| 202 | 39.7695  | -75.5767 | 1481500 |
| 203 | 39.64389 | -75.3303 | 1482500 |
| 204 | 39.16372 | -75.5191 | 1483700 |
| 205 | 38.72833 | -75.5619 | 1487000 |
| 206 | 39.66758 | -75.8256 | 1495000 |
| 207 | 42.33336 | -75.235  | 1500000 |
| 208 | 42.37778 | -75.4061 | 1502500 |
| 209 | 42.67861 | -75.5106 | 1505000 |
| 210 | 42.60278 | -76.1594 | 1509000 |
| 211 | 42.54111 | -75.8997 | 1510000 |
| 212 | 42.21806 | -75.8483 | 1512500 |
| 213 | 41.98472 | -76.5011 | 1515000 |
| 214 | 41.79702 | -77.0802 | 1516350 |
| 215 | 41.95257 | -77.1152 | 1518700 |
| 216 | 41.99674 | -77.14   | 1520000 |
| 217 | 42.02861 | -77.1322 | 1520500 |
| 218 | 42.33472 | -77.6831 | 1523500 |
| 219 | 42.31347 | -77.6511 | 1524500 |
| 220 | 42.07222 | -77.2989 | 1525981 |
| 221 | 42.12111 | -77.1292 | 1526500 |
| 222 | 42.41106 | -77.4264 | 1527500 |
| 223 | 42.2525  | -77.2167 | 1529500 |
| 224 | 42.14642 | -77.0575 | 1529950 |
| 225 | 42.00222 | -76.6347 | 1531000 |
| 226 | 41.76535 | -76.4408 | 1531500 |
| 227 | 41.70758 | -76.4849 | 1532000 |
| 228 | 41.6073  | -76.0502 | 1533400 |
| 229 | 41.50453 | -75.5421 | 1534500 |
| 230 | 41.35925 | -75.7444 | 1536000 |
| 231 | 41.31728 | -78.1031 | 1543500 |
| 232 | 41.0809  | -77.5494 | 1548005 |
| 233 | 41.52174 | -77.4475 | 1548500 |
| 234 | 40.83453 | -76.8266 | 1554000 |
| 235 | 40.86675 | -77.0483 | 1555000 |
| 236 | 40.46313 | -78.1997 | 1556000 |
| 237 | 40.61257 | -78.1406 | 1558000 |
| 238 | 40.4848  | -78.0189 | 1559000 |
| 239 | 40.07175 | -78.4925 | 1560000 |
| 240 | 40.21591 | -78.2653 | 1562000 |
| 241 | 40.3923  | -77.935  | 1563500 |
| 242 | 40.51536 | -77.4192 | 1566000 |
| 243 | 40.32342 | -77.1689 | 1568000 |
| 244 | 40.25222 | -77.0211 | 1570000 |
| 245 | 40.22481 | -76.898  | 1571500 |
| 246 | 40.29842 | -76.6677 | 1573560 |
| 247 | 40.05454 | -76.5308 | 1576000 |
| 248 | 39.62997 | -76.4033 | 1580000 |
| 249 | 39.61744 | -76.1919 | 1580520 |

|     |          |          |         |
|-----|----------|----------|---------|
| 250 | 39.54147 | -76.3301 | 1581500 |
| 251 | 39.49219 | -76.2591 | 1581649 |
| 252 | 39.51994 | -76.373  | 1581700 |
| 253 | 39.49628 | -76.3474 | 1581752 |
| 254 | 39.43928 | -76.306  | 1581757 |
| 255 | 39.68981 | -76.7815 | 1581810 |
| 256 | 39.65481 | -76.7809 | 1581830 |
| 257 | 39.62589 | -76.7725 | 1581870 |
| 258 | 39.61889 | -76.6903 | 1581920 |
| 259 | 39.67308 | -76.6752 | 1581960 |
| 260 | 39.60408 | -76.6205 | 1582000 |
| 261 | 39.54969 | -76.6361 | 1582500 |
| 262 | 39.52061 | -76.7669 | 1583100 |
| 263 | 39.51078 | -76.6765 | 1583500 |
| 264 | 39.47947 | -76.678  | 1583580 |
| 265 | 39.48558 | -76.6457 | 1583600 |
| 266 | 39.45469 | -76.4789 | 1584050 |
| 267 | 39.50536 | -76.4318 | 1584500 |
| 268 | 39.37958 | -76.4958 | 1585090 |
| 269 | 39.383   | -76.433  | 1585104 |
| 270 | 39.37364 | -76.5843 | 1585200 |
| 271 | 39.33669 | -76.5406 | 1585225 |
| 272 | 39.33008 | -76.5349 | 1585230 |
| 273 | 39.59269 | -76.9683 | 1585500 |
| 274 | 39.45189 | -76.9553 | 1586610 |
| 275 | 39.31031 | -76.7924 | 1589000 |
| 276 | 39.44294 | -76.7834 | 1589197 |
| 277 | 39.36158 | -76.7618 | 1589290 |
| 278 | 39.34589 | -76.7332 | 1589300 |
| 279 | 39.31122 | -76.7166 | 1589330 |
| 280 | 39.2715  | -76.6486 | 1589352 |
| 281 | 39.39172 | -76.6609 | 1589440 |
| 282 | 39.17    | -76.6306 | 1589500 |
| 283 | 39.23825 | -77.0557 | 1591000 |
| 284 | 39.19219 | -77.0044 | 1591610 |
| 285 | 39.17453 | -77.0214 | 1591700 |
| 286 | 39.11572 | -76.8738 | 1592500 |
| 287 | 39.16775 | -76.8513 | 1593500 |
| 288 | 39.13442 | -76.8162 | 1594000 |
| 289 | 38.95592 | -76.6937 | 1594440 |
| 290 | 38.81422 | -76.7487 | 1594526 |
| 291 | 39.30189 | -79.3069 | 1595000 |
| 292 | 39.39389 | -79.1817 | 1595500 |
| 293 | 39.47897 | -79.0638 | 1598500 |
| 294 | 39.49392 | -79.0447 | 1599000 |
| 295 | 39.66961 | -78.788  | 1601500 |
| 296 | 39.62181 | -78.7734 | 1603000 |
| 297 | 38.63567 | -79.3378 | 1605500 |
| 298 | 38.99122 | -79.1759 | 1606500 |
| 299 | 38.63151 | -79.2436 | 1607500 |

|     |          |          |         |
|-----|----------|----------|---------|
| 300 | 39.01233 | -78.9561 | 1608000 |
| 301 | 39.44704 | -78.6542 | 1608500 |
| 302 | 39.55322 | -78.555  | 1609000 |
| 303 | 39.53886 | -78.4556 | 1610000 |
| 304 | 39.64953 | -78.3441 | 1610155 |
| 305 | 39.04272 | -78.5983 | 1610400 |
| 306 | 39.58232 | -78.3097 | 1611500 |
| 307 | 39.67628 | -78.0425 | 1613525 |
| 308 | 39.21455 | -78.2881 | 1613900 |
| 309 | 39.51204 | -78.0372 | 1614000 |
| 310 | 39.71639 | -77.8248 | 1614500 |
| 311 | 39.17472 | -78.0783 | 1615000 |
| 312 | 39.42371 | -77.9386 | 1616500 |
| 313 | 39.51456 | -77.7772 | 1617800 |
| 314 | 39.71625 | -77.6066 | 1619000 |
| 315 | 39.44978 | -77.7302 | 1619500 |
| 316 | 38.48679 | -78.9603 | 1621050 |
| 317 | 38.34041 | -78.9136 | 1622000 |
| 318 | 38.2618  | -78.862  | 1625000 |
| 319 | 38.05764 | -78.9081 | 1626000 |
| 320 | 38.08875 | -78.877  | 1626850 |
| 321 | 38.21874 | -78.8367 | 1627500 |
| 322 | 38.32263 | -78.7547 | 1628500 |
| 323 | 38.64623 | -78.5347 | 1629500 |
| 324 | 38.63706 | -78.8528 | 1632000 |
| 325 | 38.60679 | -78.8034 | 1632082 |
| 326 | 38.69345 | -78.6428 | 1632900 |
| 327 | 38.74567 | -78.6389 | 1633000 |
| 328 | 38.95817 | -78.2667 | 1635500 |
| 329 | 39.06703 | -78.0038 | 1636316 |
| 330 | 39.19111 | -77.6154 | 1638350 |
| 331 | 39.2551  | -77.5764 | 1638480 |
| 332 | 39.67906 | -77.2345 | 1639000 |
| 333 | 39.61236 | -77.2374 | 1639500 |
| 334 | 39.44358 | -77.3823 | 1642190 |
| 335 | 39.40283 | -77.3661 | 1643000 |
| 336 | 39.29414 | -77.4071 | 1643500 |
| 337 | 39.16761 | -77.5359 | 1643590 |
| 338 | 38.9865  | -77.7967 | 1643700 |
| 339 | 39.07231 | -77.6839 | 1643805 |
| 340 | 39.03772 | -77.7223 | 1643880 |
| 341 | 39.01955 | -77.5775 | 1644000 |
| 342 | 39.04642 | -77.4324 | 1644280 |
| 343 | 39.12808 | -77.3358 | 1645000 |
| 344 | 38.97594 | -77.2458 | 1646000 |
| 345 | 38.9725  | -77.04   | 1648000 |
| 346 | 38.96025 | -76.926  | 1649500 |
| 347 | 39.06567 | -77.0293 | 1650500 |
| 348 | 38.95233 | -76.9661 | 1651000 |
| 349 | 38.84333 | -77.0859 | 1652500 |



|     |          |          |         |
|-----|----------|----------|---------|
| 350 | 38.8065  | -77.1097 | 1653000 |
| 351 | 38.70578 | -76.9662 | 1653600 |
| 352 | 38.81289 | -77.2283 | 1654000 |
| 353 | 38.63679 | -77.625  | 1656000 |
| 354 | 38.88239 | -77.4319 | 1656903 |
| 355 | 38.59614 | -77.056  | 1658000 |
| 356 | 38.58734 | -77.4286 | 1658500 |
| 357 | 38.4904  | -77.4336 | 1660400 |
| 358 | 38.49058 | -76.9271 | 1660920 |
| 359 | 38.33331 | -76.725  | 1661050 |
| 360 | 38.24175 | -76.5037 | 1661500 |
| 361 | 38.65568 | -78.0739 | 1662800 |
| 362 | 38.59179 | -77.965  | 1663500 |
| 363 | 38.53068 | -77.8136 | 1664000 |
| 364 | 38.28069 | -78.34   | 1665500 |
| 365 | 38.32513 | -78.0956 | 1666500 |
| 366 | 38.35041 | -77.975  | 1667500 |
| 367 | 38.30846 | -77.5292 | 1668000 |
| 368 | 37.79681 | -77.5489 | 1672500 |
| 369 | 38.04235 | -79.8814 | 2011400 |
| 370 | 38.2454  | -79.7687 | 2011460 |
| 371 | 38.1904  | -79.8117 | 2011470 |
| 372 | 38.06957 | -79.897  | 2011500 |
| 373 | 37.8029  | -80.047  | 2013000 |
| 374 | 37.78874 | -80.0006 | 2013100 |
| 375 | 37.72901 | -80.0423 | 2014000 |
| 376 | 38.1954  | -79.5703 | 2015700 |
| 377 | 37.7918  | -79.7595 | 2016000 |
| 378 | 37.77374 | -79.7845 | 2016500 |
| 379 | 37.66596 | -79.9114 | 2018000 |
| 380 | 37.46819 | -80.0053 | 2018500 |
| 381 | 37.53069 | -79.6789 | 2019500 |
| 382 | 37.90735 | -79.422  | 2021500 |
| 383 | 37.82569 | -79.4431 | 2022500 |
| 384 | 37.76263 | -79.3914 | 2024000 |
| 385 | 37.50125 | -79.2625 | 2025500 |
| 386 | 37.53625 | -78.8295 | 2026000 |
| 387 | 37.71542 | -78.9817 | 2027000 |
| 388 | 37.70236 | -79.0275 | 2027500 |
| 389 | 37.86958 | -78.8234 | 2028500 |
| 390 | 37.79737 | -78.4914 | 2029000 |
| 391 | 37.70292 | -78.3775 | 2030500 |
| 392 | 37.85792 | -78.2658 | 2034000 |
| 393 | 37.5632  | -77.5469 | 2037500 |
| 394 | 37.3071  | -78.3886 | 2039500 |
| 395 | 37.42154 | -77.8589 | 2040000 |
| 396 | 37.43626 | -77.0608 | 2042500 |
| 397 | 36.98348 | -77.7997 | 2044500 |
| 398 | 36.90015 | -77.3997 | 2045500 |
| 399 | 36.71681 | -77.8317 | 2051500 |

|     |          |          |         |
|-----|----------|----------|---------|
| 400 | 37.14013 | -80.2664 | 2053800 |
| 401 | 37.23652 | -80.2092 | 2054500 |
| 402 | 37.25847 | -79.9386 | 2055000 |
| 403 | 37.41763 | -79.9353 | 2055100 |
| 404 | 37.25514 | -79.8714 | 2056000 |
| 405 | 37.04514 | -79.8442 | 2056900 |
| 406 | 36.94598 | -79.5248 | 2058400 |
| 407 | 37.1732  | -79.5203 | 2059500 |
| 408 | 37.10459 | -79.2953 | 2060500 |
| 409 | 37.20848 | -79.3036 | 2061500 |
| 410 | 37.03944 | -78.9457 | 2062500 |
| 411 | 37.12681 | -78.9597 | 2064000 |
| 412 | 37.07931 | -78.7636 | 2065500 |
| 413 | 36.91514 | -78.7408 | 2066000 |
| 414 | 36.515   | -80.3031 | 2068500 |
| 415 | 36.57097 | -80.1295 | 2069700 |
| 416 | 36.56819 | -79.9873 | 2070000 |
| 417 | 36.53389 | -79.9914 | 2070500 |
| 418 | 36.4125  | -79.8261 | 2071000 |
| 419 | 36.77847 | -80.2492 | 2071530 |
| 420 | 36.52556 | -79.7656 | 2074000 |
| 421 | 36.61958 | -79.5042 | 2074500 |
| 422 | 36.56264 | -79.3697 | 2075045 |
| 423 | 36.64236 | -79.0895 | 2075500 |
| 424 | 36.67959 | -78.3267 | 2079640 |
| 425 | 36.19417 | -78.5831 | 2081500 |
| 426 | 36.09306 | -78.2961 | 2081747 |
| 427 | 35.95472 | -77.7872 | 2082585 |
| 428 | 36.11222 | -77.92   | 2082770 |
| 429 | 36.18333 | -77.8761 | 2082950 |
| 430 | 36.15056 | -77.6931 | 2083000 |
| 431 | 36.07111 | -79.0956 | 2085000 |
| 432 | 36.07222 | -78.9078 | 2085070 |
| 433 | 36.18278 | -78.8789 | 2085500 |
| 434 | 36.14861 | -78.8289 | 2086500 |
| 435 | 35.83806 | -78.6742 | 2087275 |
| 436 | 35.81111 | -78.6108 | 2087324 |
| 437 | 35.75833 | -78.5831 | 2087359 |
| 438 | 35.64722 | -78.4053 | 2087500 |
| 439 | 35.71889 | -78.7522 | 2087580 |
| 440 | 35.57083 | -78.5906 | 2088000 |
| 441 | 35.51139 | -78.1603 | 2088500 |
| 442 | 35.69111 | -78.1097 | 2090380 |
| 443 | 35.48889 | -77.8061 | 2091000 |
| 444 | 35.31389 | -77.3028 | 2091814 |
| 445 | 34.84917 | -77.5194 | 2093000 |
| 446 | 36.1725  | -79.9528 | 2093800 |
| 447 | 36.04944 | -79.8553 | 2094659 |
| 448 | 36.03806 | -79.7997 | 2094770 |
| 449 | 36.03111 | -79.7961 | 2094775 |

|     |          |          |         |
|-----|----------|----------|---------|
| 450 | 36.06    | -79.7258 | 2095000 |
| 451 | 36.07917 | -79.8128 | 2095181 |
| 452 | 36.09778 | -79.7825 | 2095271 |
| 453 | 36.12056 | -79.7081 | 2095500 |
| 454 | 36.08722 | -79.3661 | 2096500 |
| 455 | 35.76528 | -79.1358 | 2096960 |
| 456 | 35.885   | -78.9653 | 2097314 |
| 457 | 36.03722 | -79.9456 | 2099000 |
| 458 | 35.72639 | -79.6556 | 2100500 |
| 459 | 35.65972 | -79.4017 | 2101800 |
| 460 | 35.62694 | -79.1161 | 2102000 |
| 461 | 35.18278 | -79.1775 | 2102908 |
| 462 | 35.19333 | -78.9856 | 2103000 |
| 463 | 34.99972 | -79.2147 | 2104220 |
| 464 | 34.83556 | -78.8236 | 2105500 |
| 465 | 35.99083 | -81.5583 | 2111000 |
| 466 | 36.1525  | -81.1456 | 2112000 |
| 467 | 36.24042 | -80.8492 | 2112250 |
| 468 | 36.40444 | -80.5617 | 2113850 |
| 469 | 36.13167 | -80.4439 | 2115360 |
| 470 | 35.85667 | -80.3869 | 2116500 |
| 471 | 35.845   | -80.6589 | 2118000 |
| 472 | 36.00056 | -80.7456 | 2118500 |
| 473 | 35.71761 | -80.5961 | 2120780 |
| 474 | 35.80694 | -80.2347 | 2121500 |
| 475 | 35.41417 | -80.7519 | 2124080 |
| 476 | 35.14889 | -80.1758 | 2126000 |
| 477 | 35.38722 | -79.8314 | 2128000 |
| 478 | 34.75056 | -79.3867 | 2132320 |
| 479 | 35.06111 | -79.4939 | 2133500 |
| 480 | 35.68583 | -82.0603 | 2137727 |
| 481 | 35.79556 | -81.8911 | 2138500 |
| 482 | 35.83361 | -81.7119 | 2140991 |
| 483 | 35.94556 | -81.2369 | 2142000 |
| 484 | 35.40694 | -80.8906 | 2142654 |
| 485 | 35.32861 | -80.9097 | 2142900 |
| 486 | 35.29944 | -80.9464 | 2142914 |
| 487 | 35.68444 | -81.4033 | 2143000 |
| 488 | 35.59056 | -81.5669 | 2143040 |
| 489 | 35.42056 | -81.2653 | 2143500 |
| 490 | 35.30639 | -81.2347 | 2144000 |
| 491 | 35.26194 | -80.8369 | 2146211 |
| 492 | 35.22833 | -80.8692 | 2146285 |
| 493 | 35.19778 | -80.9044 | 2146300 |
| 494 | 35.20667 | -80.9219 | 2146315 |
| 495 | 35.09083 | -80.8994 | 2146381 |
| 496 | 35.20361 | -80.8369 | 2146409 |
| 497 | 35.14806 | -80.8578 | 2146507 |
| 498 | 35.08528 | -80.8822 | 2146530 |
| 499 | 35.18667 | -80.7367 | 2146562 |

|     |          |          |         |
|-----|----------|----------|---------|
| 500 | 35.13778 | -80.7675 | 2146600 |
| 501 | 35.07694 | -80.8225 | 2146670 |
| 502 | 35.14083 | -80.82   | 2146700 |
| 503 | 35.0665  | -80.8699 | 2146750 |
| 504 | 34.83626 | -80.8795 | 2147020 |
| 505 | 35.42333 | -82.1117 | 2149000 |
| 506 | 35.40444 | -81.8725 | 2150495 |
| 507 | 35.21083 | -81.6975 | 2151500 |
| 508 | 35.49306 | -81.6822 | 2152100 |
| 509 | 35.12402 | -81.5879 | 2153200 |
| 510 | 35.03124 | -81.4926 | 2153551 |
| 511 | 35.12095 | -81.9859 | 2154500 |
| 512 | 35.10651 | -82.1296 | 2154790 |
| 513 | 35.10984 | -81.9596 | 2155500 |
| 514 | 34.59514 | -81.4212 | 2156500 |
| 515 | 35.03889 | -82.2186 | 2157470 |
| 516 | 34.85651 | -82.2262 | 2160326 |
| 517 | 34.68346 | -82.0398 | 2160390 |
| 518 | 34.5093  | -81.5982 | 2160700 |
| 519 | 34.2432  | -81.3195 | 2161000 |
| 520 | 34.02738 | -81.0418 | 2162093 |
| 521 | 35.06345 | -82.6501 | 2162290 |
| 522 | 35.12012 | -82.5376 | 2162350 |
| 523 | 34.84234 | -82.4807 | 2162500 |
| 524 | 34.39179 | -82.2235 | 2163500 |
| 525 | 34.80012 | -82.3651 | 2164000 |
| 526 | 34.6529  | -82.2976 | 2164110 |
| 527 | 34.52012 | -82.1571 | 2165200 |
| 528 | 34.17458 | -81.864  | 2167000 |
| 529 | 34.20958 | -81.7632 | 2167450 |
| 530 | 34.16875 | -81.6104 | 2167582 |
| 531 | 33.99321 | -81.0498 | 2169500 |
| 532 | 33.9896  | -80.9743 | 2169570 |
| 533 | 33.75348 | -81.6018 | 2172300 |
| 534 | 32.98905 | -81.0526 | 2175500 |
| 535 | 32.83628 | -81.1318 | 2176500 |
| 536 | 34.81398 | -83.306  | 2177000 |
| 537 | 34.89037 | -83.5304 | 2178400 |
| 538 | 34.73204 | -83.3757 | 2181580 |
| 539 | 34.8015  | -82.7485 | 2186000 |
| 540 | 34.38316 | -82.5774 | 2187910 |
| 541 | 34.16872 | -82.8965 | 2188600 |
| 542 | 33.97417 | -82.77   | 2192000 |
| 543 | 34.07151 | -82.5007 | 2192500 |
| 544 | 33.68263 | -82.8579 | 2193340 |
| 545 | 33.61278 | -82.7425 | 2193500 |
| 546 | 33.7293  | -82.1818 | 2196000 |
| 547 | 33.37375 | -81.9429 | 2197000 |
| 548 | 33.3732  | -82.1387 | 2197020 |
| 549 | 32.97567 | -82.6098 | 2201000 |

|     |          |          |         |
|-----|----------|----------|---------|
| 550 | 32.16798 | -81.4882 | 2202600 |
| 551 | 33.679   | -84.358  | 2203655 |
| 552 | 33.62983 | -84.1285 | 2204070 |
| 553 | 33.57983 | -84.0641 | 2204130 |
| 554 | 33.92594 | -84.0377 | 2205522 |
| 555 | 33.77222 | -84.0578 | 2207120 |
| 556 | 33.7775  | -84.0378 | 2207185 |
| 557 | 33.73372 | -84.0619 | 2207220 |
| 558 | 33.66694 | -83.9381 | 2207335 |
| 559 | 33.81528 | -83.9901 | 2207385 |
| 560 | 33.82139 | -83.9425 | 2207400 |
| 561 | 33.66139 | -83.9278 | 2207448 |
| 562 | 33.97856 | -83.9392 | 2208050 |
| 563 | 33.94972 | -83.9483 | 2208130 |
| 564 | 33.91694 | -83.8881 | 2208150 |
| 565 | 33.63939 | -83.7784 | 2208450 |
| 566 | 33.31261 | -83.8374 | 2210500 |
| 567 | 33.27167 | -84.2364 | 2211375 |
| 568 | 33.10031 | -83.7232 | 2212600 |
| 569 | 32.80889 | -83.7583 | 2213500 |
| 570 | 34.08222 | -83.8544 | 2217274 |
| 571 | 34.03167 | -83.5633 | 2217475 |
| 572 | 33.94667 | -83.4228 | 2217500 |
| 573 | 33.96972 | -83.3776 | 2217770 |
| 574 | 33.72123 | -83.2954 | 2218300 |
| 575 | 34.01028 | -83.8942 | 2218565 |
| 576 | 33.78818 | -83.4741 | 2219000 |
| 577 | 33.25236 | -83.4813 | 2221525 |
| 578 | 32.93987 | -83.0668 | 2223056 |
| 579 | 32.89127 | -82.961  | 2223110 |
| 580 | 32.78738 | -82.9571 | 2223248 |
| 581 | 29.97941 | -81.852  | 2245500 |
| 582 | 30.1133  | -81.9065 | 2246000 |
| 583 | 27.50448 | -81.8009 | 2295637 |
| 584 | 27.47365 | -82.2112 | 2299950 |
| 585 | 27.67114 | -82.3526 | 2300500 |
| 586 | 27.87225 | -82.2112 | 2301500 |
| 587 | 28.15029 | -82.2318 | 2303000 |
| 588 | 30.51242 | -84.5235 | 2329600 |
| 589 | 34.70083 | -83.7289 | 2330450 |
| 590 | 34.54072 | -83.6228 | 2331600 |
| 591 | 34.52806 | -83.9397 | 2333500 |
| 592 | 34.1325  | -84.07   | 2334480 |
| 593 | 34.09639 | -84.0781 | 2334578 |
| 594 | 34.07149 | -84.1302 | 2334620 |
| 595 | 34.0325  | -84.0889 | 2334885 |
| 596 | 33.965   | -84.2647 | 2335350 |
| 597 | 34.05056 | -84.2694 | 2335700 |
| 598 | 34.0175  | -84.3533 | 2335757 |
| 599 | 33.96806 | -84.3828 | 2335815 |

|     |          |          |         |
|-----|----------|----------|---------|
| 600 | 33.95389 | -84.4433 | 2335870 |
| 601 | 33.89371 | -84.4577 | 2335910 |
| 602 | 33.85917 | -84.4544 | 2336000 |
| 603 | 33.90583 | -84.225  | 2336030 |
| 604 | 33.83149 | -84.3427 | 2336120 |
| 605 | 33.82031 | -84.4076 | 2336300 |
| 606 | 33.82177 | -84.4388 | 2336313 |
| 607 | 33.86917 | -84.3789 | 2336360 |
| 608 | 33.83844 | -84.4394 | 2336410 |
| 609 | 33.81694 | -84.48   | 2336490 |
| 610 | 33.79427 | -84.4744 | 2336526 |
| 611 | 33.74344 | -84.5683 | 2336728 |
| 612 | 33.85927 | -84.688  | 2336870 |
| 613 | 33.85927 | -84.6527 | 2336968 |
| 614 | 33.77661 | -84.6155 | 2337000 |
| 615 | 33.72094 | -84.6149 | 2337040 |
| 616 | 33.52956 | -84.9283 | 2337500 |
| 617 | 33.47706 | -84.9008 | 2338000 |
| 618 | 33.27797 | -85.1009 | 2338500 |
| 619 | 33.34072 | -85.2267 | 2338523 |
| 620 | 33.41556 | -84.3847 | 2344350 |
| 621 | 33.25694 | -84.3628 | 2344478 |
| 622 | 33.24417 | -84.4292 | 2344500 |
| 623 | 33.31917 | -84.5222 | 2344700 |
| 624 | 33.04769 | -84.5266 | 2344872 |
| 625 | 33.18722 | -84.2294 | 2346310 |
| 626 | 32.72139 | -84.2325 | 2347500 |
| 627 | 32.29306 | -84.0436 | 2349605 |
| 628 | 32.19556 | -83.9022 | 2349900 |
| 629 | 31.76444 | -84.2533 | 2350900 |
| 630 | 32.08306 | -84.2581 | 2351500 |
| 631 | 31.77611 | -84.1394 | 2351890 |
| 632 | 31.30694 | -84.3389 | 2353000 |
| 633 | 31.52694 | -84.5828 | 2353265 |
| 634 | 31.555   | -84.6808 | 2353400 |
| 635 | 31.38278 | -84.5464 | 2353500 |
| 636 | 30.38464 | -85.5566 | 2359500 |
| 637 | 31.27239 | -85.9583 | 2362240 |
| 638 | 31.59489 | -85.783  | 2363000 |
| 639 | 30.62464 | -85.9424 | 2365769 |
| 640 | 30.66908 | -86.1866 | 2366996 |
| 641 | 30.79602 | -86.3069 | 2368500 |
| 642 | 30.83352 | -86.7347 | 2370000 |
| 643 | 30.70852 | -86.9722 | 2370500 |
| 644 | 30.96518 | -87.2341 | 2375500 |
| 645 | 30.69047 | -87.4403 | 2376500 |
| 646 | 30.54547 | -87.7986 | 2378500 |
| 647 | 34.67509 | -84.5085 | 2380500 |
| 648 | 34.57044 | -84.4689 | 2381600 |
| 649 | 34.52278 | -84.6111 | 2382200 |

|     |          |          |         |
|-----|----------|----------|---------|
| 650 | 34.6037  | -84.6955 | 2382500 |
| 651 | 34.56417 | -84.8331 | 2383500 |
| 652 | 34.8275  | -84.851  | 2384500 |
| 653 | 34.87194 | -84.7213 | 2384540 |
| 654 | 34.74333 | -84.8805 | 2385170 |
| 655 | 34.78844 | -84.975  | 2385500 |
| 656 | 34.66692 | -84.9279 | 2387000 |
| 657 | 34.57711 | -84.9419 | 2387500 |
| 658 | 34.49486 | -84.9654 | 2387600 |
| 659 | 34.37167 | -85.2639 | 2388320 |
| 660 | 34.36092 | -85.1402 | 2388350 |
| 661 | 34.29843 | -85.138  | 2388500 |
| 662 | 34.35806 | -84.1133 | 2389150 |
| 663 | 34.42565 | -84.2119 | 2390000 |
| 664 | 34.26343 | -84.5955 | 2392360 |
| 665 | 34.12232 | -84.5044 | 2392780 |
| 666 | 34.05639 | -84.5356 | 2392950 |
| 667 | 34.06833 | -84.5356 | 2392975 |
| 668 | 33.99528 | -84.6931 | 2393419 |
| 669 | 34.23211 | -85.1169 | 2395980 |
| 670 | 34.2005  | -85.2564 | 2397000 |
| 671 | 33.99694 | -85.2661 | 2397410 |
| 672 | 34.06019 | -85.3136 | 2397500 |
| 673 | 34.46639 | -85.3361 | 2398000 |
| 674 | 32.43986 | -86.1955 | 2419890 |
| 675 | 32.30736 | -86.2994 | 2421000 |
| 676 | 33.41566 | -86.7397 | 2423425 |
| 677 | 32.44402 | -87.1803 | 2425000 |
| 678 | 34.265   | -88.4453 | 2431000 |
| 679 | 34.23556 | -88.6958 | 2435020 |
| 680 | 33.79    | -88.3153 | 2439400 |
| 681 | 33.51417 | -88.3953 | 2443500 |
| 682 | 33.07236 | -88.5588 | 2448000 |
| 683 | 33.70983 | -86.9833 | 2456500 |
| 684 | 33.51761 | -86.8792 | 2458450 |
| 685 | 32.57375 | -88.1934 | 2467500 |
| 686 | 31.70694 | -89.4069 | 2472000 |
| 687 | 31.42583 | -89.4147 | 2472500 |
| 688 | 31.34306 | -89.2803 | 2473000 |
| 689 | 31.68083 | -89.1156 | 2473500 |
| 690 | 31.33278 | -89.1125 | 2474500 |
| 691 | 31.10278 | -88.8083 | 2475000 |
| 692 | 32.32611 | -88.9092 | 2475500 |
| 693 | 32.36778 | -88.6772 | 2476500 |
| 694 | 32.17583 | -88.8197 | 2477000 |
| 695 | 31.14861 | -88.5481 | 2478500 |
| 696 | 31.05194 | -89.2042 | 2479130 |
| 697 | 30.55861 | -89.1219 | 2481000 |
| 698 | 30.48361 | -89.2744 | 2481510 |
| 699 | 32.84139 | -89.0978 | 2481880 |

|     |          |          |         |
|-----|----------|----------|---------|
| 700 | 32.58833 | -89.465  | 2483000 |
| 701 | 32.66722 | -89.6461 | 2483500 |
| 702 | 32.70611 | -89.6719 | 2484500 |
| 703 | 32.28139 | -90.1789 | 2486000 |
| 704 | 31.97778 | -89.8975 | 2487500 |
| 705 | 31.23778 | -89.8469 | 2489000 |
| 706 | 31.17694 | -90.2794 | 2490500 |
| 707 | 30.62936 | -89.8973 | 2492000 |
| 708 | 30.57417 | -89.5947 | 2492343 |
| 709 | 30.66222 | -89.6861 | 2492360 |
| 710 | 41.9634  | -78.3861 | 3010500 |
| 711 | 42.15639 | -78.7153 | 3011020 |
| 712 | 41.93811 | -79.1331 | 3015000 |
| 713 | 41.48173 | -79.6953 | 3020500 |
| 714 | 41.63255 | -80.1595 | 3023100 |
| 715 | 41.48617 | -78.6784 | 3028500 |
| 716 | 41.33062 | -79.2089 | 3029500 |
| 717 | 40.99451 | -79.3942 | 3032500 |
| 718 | 40.65479 | -79.3487 | 3038000 |
| 719 | 40.28563 | -78.9206 | 3040000 |
| 720 | 40.34591 | -78.8825 | 3041000 |
| 721 | 40.34139 | -78.9261 | 3041029 |
| 722 | 40.41924 | -79.0261 | 3041500 |
| 723 | 40.47701 | -79.1867 | 3042000 |
| 724 | 40.51729 | -79.1717 | 3042500 |
| 725 | 40.29257 | -79.3406 | 3045000 |
| 726 | 40.60451 | -79.552  | 3048500 |
| 727 | 40.52035 | -79.9381 | 3049800 |
| 728 | 40.50314 | -79.9484 | 3049807 |
| 729 | 40.47783 | -79.97   | 3049819 |
| 730 | 38.80928 | -79.8817 | 3050000 |
| 731 | 38.92372 | -79.879  | 3050500 |
| 732 | 39.02927 | -79.9359 | 3051000 |
| 733 | 39.03954 | -80.0681 | 3052000 |
| 734 | 39.15038 | -80.0387 | 3054500 |
| 735 | 39.2387  | -80.359  | 3058975 |
| 736 | 39.42231 | -80.2759 | 3061000 |
| 737 | 39.62925 | -79.9526 | 3062500 |
| 738 | 39.07233 | -79.6228 | 3065000 |
| 739 | 39.12705 | -79.4684 | 3066000 |
| 740 | 38.61706 | -79.8698 | 3067510 |
| 741 | 38.91316 | -79.7703 | 3068800 |
| 742 | 39.12156 | -79.6755 | 3069500 |
| 743 | 39.49481 | -79.6445 | 3070260 |
| 744 | 39.62175 | -79.7046 | 3070500 |
| 745 | 39.75924 | -79.9706 | 3072000 |
| 746 | 39.92313 | -80.0726 | 3073000 |
| 747 | 40.26229 | -79.9012 | 3075070 |
| 748 | 39.85992 | -79.2288 | 3079000 |
| 749 | 39.82036 | -79.3214 | 3080000 |



|     |          |          |         |
|-----|----------|----------|---------|
| 750 | 39.86591 | -79.4945 | 3081500 |
| 751 | 40.01753 | -79.5932 | 3082500 |
| 752 | 40.40535 | -79.8278 | 3084800 |
| 753 | 40.40062 | -80.0964 | 3085500 |
| 754 | 41.13145 | -80.9712 | 3091500 |
| 755 | 41.26117 | -80.9543 | 3093000 |
| 756 | 41.23922 | -80.8806 | 3094000 |
| 757 | 41.10506 | -80.6626 | 3098600 |
| 758 | 41.26617 | -80.4726 | 3103500 |
| 759 | 40.88867 | -80.337  | 3105500 |
| 760 | 40.81701 | -80.2423 | 3106000 |
| 761 | 40.88395 | -80.2337 | 3106500 |
| 762 | 40.62784 | -80.3376 | 3108000 |
| 763 | 40.1934  | -80.7342 | 3111500 |
| 764 | 40.06702 | -80.8084 | 3111548 |
| 765 | 40.04452 | -80.6609 | 3112000 |
| 766 | 39.56313 | -81.2037 | 3115400 |
| 767 | 40.67256 | -81.2598 | 3117500 |
| 768 | 40.84145 | -81.3537 | 3118000 |
| 769 | 40.74972 | -81.3694 | 3118500 |
| 770 | 40.40562 | -82.4999 | 3136500 |
| 771 | 40.2484  | -81.8729 | 3140500 |
| 772 | 40.01452 | -81.5871 | 3142000 |
| 773 | 40.05923 | -82.3396 | 3146500 |
| 774 | 39.64507 | -81.8499 | 3150000 |
| 775 | 39.05897 | -81.3896 | 3155000 |
| 776 | 39.56507 | -82.4746 | 3157500 |
| 777 | 39.32896 | -82.0876 | 3159500 |
| 778 | 39.06369 | -81.8818 | 3159540 |
| 779 | 36.39333 | -81.4069 | 3161000 |
| 780 | 36.64735 | -80.979  | 3164000 |
| 781 | 36.64596 | -80.9192 | 3165000 |
| 782 | 36.83485 | -80.9526 | 3165500 |
| 783 | 36.93901 | -80.8873 | 3167000 |
| 784 | 36.93762 | -80.7456 | 3168000 |
| 785 | 37.03763 | -80.5567 | 3170000 |
| 786 | 37.26818 | -80.7095 | 3173000 |
| 787 | 37.30568 | -80.8498 | 3175500 |
| 788 | 37.3729  | -80.8606 | 3176500 |
| 789 | 37.27151 | -81.3048 | 3177710 |
| 790 | 37.54401 | -81.0104 | 3179000 |
| 791 | 38.54373 | -79.8331 | 3180500 |
| 792 | 38.18622 | -80.13   | 3182500 |
| 793 | 37.72429 | -80.6415 | 3183500 |
| 794 | 37.64012 | -80.8051 | 3184000 |
| 795 | 37.76067 | -81.1623 | 3185000 |
| 796 | 37.95511 | -81.0765 | 3185400 |
| 797 | 38.379   | -80.484  | 3186500 |
| 798 | 38.29539 | -80.5265 | 3187500 |
| 799 | 38.29094 | -80.6409 | 3189100 |

|     |          |          |         |
|-----|----------|----------|---------|
| 800 | 38.23344 | -81.1809 | 3192000 |
| 801 | 38.13816 | -81.2143 | 3193000 |
| 802 | 38.59733 | -80.4904 | 3194700 |
| 803 | 38.47093 | -81.284  | 3197000 |
| 804 | 37.96622 | -81.5243 | 3198350 |
| 805 | 38.17982 | -81.7115 | 3198500 |
| 806 | 38.33898 | -81.8415 | 3200500 |
| 807 | 38.44537 | -82.0068 | 3201405 |
| 808 | 39.23056 | -82.2858 | 3201902 |
| 809 | 38.87361 | -82.3558 | 3202000 |
| 810 | 37.604   | -81.6451 | 3202400 |
| 811 | 37.62317 | -81.7073 | 3202750 |
| 812 | 37.84233 | -81.976  | 3203600 |
| 813 | 38.59619 | -82.4952 | 3205470 |
| 814 | 37.35372 | -82.1957 | 3207800 |
| 815 | 37.20705 | -82.2957 | 3208500 |
| 816 | 37.124   | -82.4388 | 3208950 |
| 817 | 37.46427 | -82.5263 | 3209500 |
| 818 | 37.81537 | -82.7915 | 3212500 |
| 819 | 37.44122 | -81.5998 | 3212750 |
| 820 | 37.39539 | -81.8026 | 3212980 |
| 821 | 37.44556 | -81.8711 | 3213500 |
| 822 | 37.67316 | -82.2801 | 3213700 |
| 823 | 37.83732 | -82.4088 | 3214500 |
| 824 | 38.33008 | -82.9393 | 3216500 |
| 825 | 38.56425 | -82.9521 | 3217000 |
| 826 | 40.4195  | -83.1971 | 3219500 |
| 827 | 40.54895 | -82.8213 | 3223425 |
| 828 | 40.35506 | -83.0671 | 3225500 |
| 829 | 40.11034 | -83.0319 | 3226800 |
| 830 | 39.90951 | -83.0091 | 3227500 |
| 831 | 40.10367 | -82.8841 | 3228500 |
| 832 | 39.70062 | -83.1102 | 3230500 |
| 833 | 39.34145 | -82.971  | 3231500 |
| 834 | 38.80368 | -83.421  | 3237500 |
| 835 | 39.17145 | -84.298  | 3245500 |
| 836 | 39.13701 | -84.238  | 3247500 |
| 837 | 37.73065 | -83.0579 | 3248300 |
| 838 | 38.42007 | -83.9974 | 3250500 |
| 839 | 38.60007 | -84.2663 | 3251500 |
| 840 | 40.28699 | -84.1499 | 3261500 |
| 841 | 40.21449 | -84.2441 | 3262000 |
| 842 | 40.04033 | -84.1977 | 3262700 |
| 843 | 39.8745  | -84.1619 | 3263000 |
| 844 | 39.87033 | -84.2861 | 3266000 |
| 845 | 39.92312 | -83.8702 | 3269500 |
| 846 | 39.79728 | -84.0885 | 3270000 |
| 847 | 39.76534 | -84.1974 | 3270500 |
| 848 | 39.63783 | -84.4038 | 3272000 |
| 849 | 39.51989 | -84.4127 | 3272100 |

|     |          |          |         |
|-----|----------|----------|---------|
| 850 | 39.39117 | -84.5722 | 3274000 |
| 851 | 39.57949 | -85.158  | 3275000 |
| 852 | 39.73255 | -84.9597 | 3275600 |
| 853 | 39.40747 | -85.0129 | 3276500 |
| 854 | 37.1176  | -82.8246 | 3277300 |
| 855 | 37.55231 | -83.3857 | 3280000 |
| 856 | 37.47981 | -83.6752 | 3281500 |
| 857 | 37.55536 | -83.7683 | 3282000 |
| 858 | 37.67833 | -83.9483 | 3282120 |
| 859 | 37.89397 | -84.2605 | 3284000 |
| 860 | 37.74536 | -84.5866 | 3284500 |
| 861 | 37.82924 | -84.7238 | 3286500 |
| 862 | 38.20174 | -84.8816 | 3287500 |
| 863 | 38.26868 | -84.8147 | 3289500 |
| 864 | 38.43896 | -84.9633 | 3290500 |
| 865 | 38.70506 | -84.8238 | 3291500 |
| 866 | 37.98507 | -85.7175 | 3298500 |
| 867 | 37.76729 | -85.7038 | 3301500 |
| 868 | 38.43395 | -86.1916 | 3302800 |
| 869 | 40.89856 | -85.4132 | 3324000 |
| 870 | 40.71254 | -85.4536 | 3324300 |
| 871 | 40.79088 | -85.8203 | 3325000 |
| 872 | 40.57642 | -85.6595 | 3326500 |
| 873 | 40.75    | -86.0667 | 3327500 |
| 874 | 40.99456 | -85.7826 | 3328000 |
| 875 | 40.78198 | -86.2639 | 3328500 |
| 876 | 40.74643 | -86.3775 | 3329000 |
| 877 | 40.59031 | -86.6214 | 3329700 |
| 878 | 41.3206  | -85.7892 | 3330500 |
| 879 | 41.15726 | -86.5636 | 3331500 |
| 880 | 40.59392 | -86.7703 | 3333050 |
| 881 | 40.44128 | -85.9188 | 3333450 |
| 882 | 40.47089 | -86.1529 | 3333700 |
| 883 | 40.41781 | -86.7681 | 3334500 |
| 884 | 40.44059 | -86.8292 | 3335000 |
| 885 | 40.42194 | -86.8969 | 3335500 |
| 886 | 40.14004 | -87.4067 | 3336000 |
| 887 | 40.13698 | -87.7459 | 3336645 |
| 888 | 40.26531 | -87.6428 | 3338780 |
| 889 | 40.10087 | -87.5972 | 3339000 |
| 890 | 40.10448 | -86.5228 | 3339280 |
| 891 | 40.04893 | -86.8995 | 3339500 |
| 892 | 39.79254 | -87.3739 | 3340500 |
| 893 | 39.81254 | -86.9539 | 3340800 |
| 894 | 39.65254 | -87.2936 | 3341300 |
| 895 | 39.46572 | -87.4195 | 3341500 |
| 896 | 38.97421 | -87.4259 | 3342500 |
| 897 | 38.93643 | -88.0225 | 3345500 |
| 898 | 39.01004 | -87.9456 | 3346000 |
| 899 | 38.72361 | -87.6644 | 3346500 |

|     |          |          |         |
|-----|----------|----------|---------|
| 900 | 40.2039  | -85.3861 | 3347000 |
| 901 | 40.10528 | -85.6714 | 3348000 |
| 902 | 40.1106  | -85.7108 | 3348130 |
| 903 | 40.04698 | -86.0172 | 3349000 |
| 904 | 40.02893 | -85.9955 | 3350700 |
| 905 | 39.91059 | -86.1055 | 3351000 |
| 906 | 39.92698 | -86.1722 | 3351072 |
| 907 | 39.82976 | -86.2061 | 3351310 |
| 908 | 39.95476 | -85.8675 | 3351500 |
| 909 | 39.85199 | -86.0875 | 3352500 |
| 910 | 39.77477 | -86.1897 | 3352953 |
| 911 | 39.77227 | -86.1394 | 3352988 |
| 912 | 39.73714 | -86.1697 | 3353000 |
| 913 | 39.77588 | -86.0639 | 3353120 |
| 914 | 39.94643 | -86.2603 | 3353200 |
| 915 | 39.81449 | -86.3053 | 3353460 |
| 916 | 39.77782 | -86.2503 | 3353500 |
| 917 | 39.78754 | -86.2286 | 3353600 |
| 918 | 39.71449 | -86.2005 | 3353611 |
| 919 | 39.60877 | -86.382  | 3353800 |
| 920 | 39.62838 | -86.3572 | 3353910 |
| 921 | 39.49755 | -86.4005 | 3354000 |
| 922 | 39.81616 | -86.7533 | 3357330 |
| 923 | 39.76171 | -86.7295 | 3357350 |
| 924 | 39.43356 | -86.7634 | 3358000 |
| 925 | 39.38407 | -87.0209 | 3360000 |
| 926 | 39.74393 | -85.5758 | 3361000 |
| 927 | 39.52925 | -85.7775 | 3361500 |
| 928 | 39.71421 | -85.8855 | 3361650 |
| 929 | 39.65699 | -85.9575 | 3361850 |
| 930 | 39.41894 | -86.005  | 3362000 |
| 931 | 39.36092 | -85.9981 | 3362500 |
| 932 | 39.41755 | -85.6341 | 3363500 |
| 933 | 39.23505 | -85.9267 | 3363900 |
| 934 | 39.20005 | -85.9255 | 3364000 |
| 935 | 39.26783 | -85.8561 | 3364200 |
| 936 | 39.27477 | -85.7016 | 3364500 |
| 937 | 39.18533 | -85.875  | 3364650 |
| 938 | 38.80422 | -85.6739 | 3366500 |
| 939 | 39.07033 | -85.4861 | 3368000 |
| 940 | 38.97644 | -85.6197 | 3369500 |
| 941 | 38.667   | -86.7919 | 3373500 |
| 942 | 38.67311 | -86.745  | 3373508 |
| 943 | 39.10393 | -88.5942 | 3378635 |
| 944 | 38.36333 | -88.5878 | 3380500 |
| 945 | 36.86231 | -83.8874 | 3403500 |
| 946 | 36.74342 | -84.156  | 3404000 |
| 947 | 36.28445 | -86.7063 | 3426470 |
| 948 | 36.0816  | -86.6807 | 3431000 |
| 949 | 36.11757 | -86.719  | 3431060 |

|     |          |          |         |
|-----|----------|----------|---------|
| 950 | 36.12999 | -86.761  | 3431300 |
| 951 | 36.21762 | -86.8202 | 3431599 |
| 952 | 36.15122 | -86.8543 | 3431700 |
| 953 | 35.92082 | -86.8655 | 3432350 |
| 954 | 36.05456 | -86.9285 | 3433500 |
| 955 | 36.122   | -87.0989 | 3434500 |
| 956 | 36.55472 | -87.1419 | 3436100 |
| 957 | 35.14333 | -82.8247 | 3439000 |
| 958 | 35.27306 | -82.7058 | 3441000 |
| 959 | 35.29917 | -82.6239 | 3443000 |
| 960 | 35.39806 | -82.595  | 3446000 |
| 961 | 35.56833 | -82.5447 | 3451000 |
| 962 | 35.60889 | -82.5781 | 3451500 |
| 963 | 35.76972 | -82.6208 | 3453000 |
| 964 | 35.78639 | -82.6608 | 3453500 |
| 965 | 35.98151 | -83.1612 | 3455000 |
| 966 | 35.39611 | -82.9375 | 3455500 |
| 967 | 35.46389 | -82.9    | 3456100 |
| 968 | 35.46167 | -82.8697 | 3456500 |
| 969 | 35.52194 | -82.8481 | 3456991 |
| 970 | 35.635   | -82.99   | 3459500 |
| 971 | 35.83139 | -82.1842 | 3463300 |
| 972 | 36.1765  | -82.4574 | 3465500 |
| 973 | 36.76039 | -81.6312 | 3471500 |
| 974 | 36.65178 | -81.844  | 3473000 |
| 975 | 36.80734 | -81.6221 | 3474000 |
| 976 | 36.71317 | -81.8187 | 3475000 |
| 977 | 36.63177 | -82.1337 | 3478400 |
| 978 | 36.23917 | -81.8222 | 3479000 |
| 979 | 36.89678 | -81.7462 | 3488000 |
| 980 | 36.42621 | -82.9518 | 3491000 |
| 981 | 35.66453 | -83.7113 | 3497300 |
| 982 | 35.78562 | -83.8846 | 3498500 |
| 983 | 35.15    | -83.3797 | 3500000 |
| 984 | 35.33639 | -83.5269 | 3503000 |
| 985 | 35.1275  | -83.6186 | 3504000 |
| 986 | 35.46139 | -83.3536 | 3512000 |
| 987 | 36.94483 | -82.1549 | 3524000 |
| 988 | 36.64871 | -82.7504 | 3527000 |
| 989 | 36.86899 | -82.7754 | 3529500 |
| 990 | 36.66203 | -83.0949 | 3531500 |
| 991 | 36.54215 | -83.6303 | 3532000 |
| 992 | 35.98313 | -84.558  | 3540500 |
| 993 | 35.13889 | -83.9806 | 3550000 |
| 994 | 35.01412 | -85.2066 | 3567500 |
| 995 | 34.8975  | -85.4631 | 3568933 |
| 996 | 34.62425 | -86.3064 | 3574500 |
| 997 | 34.74926 | -86.4467 | 3575100 |
| 998 | 34.75176 | -86.8233 | 3576250 |
| 999 | 35.2968  | -85.8698 | 3578000 |

|      |          |          |         |
|------|----------|----------|---------|
| 1000 | 35.01424 | -86.9947 | 3584600 |
| 1001 | 34.67009 | -87.3172 | 3586500 |
| 1002 | 35.02412 | -87.579  | 3588500 |
| 1003 | 35.5273  | -86.3403 | 3597590 |
| 1004 | 35.48035 | -86.4992 | 3598000 |
| 1005 | 35.57636 | -86.7786 | 3599240 |
| 1006 | 35.61805 | -87.0323 | 3599500 |
| 1007 | 35.78423 | -87.46   | 3601990 |
| 1008 | 35.87126 | -87.5014 | 3602500 |
| 1009 | 35.93006 | -87.7431 | 3603000 |
| 1010 | 35.49591 | -87.8328 | 3604000 |
| 1011 | 46.51134 | -90.0746 | 4031000 |
| 1012 | 46.35689 | -89.0765 | 4033000 |
| 1013 | 46.72077 | -89.2071 | 4040000 |
| 1014 | 46.72583 | -88.6624 | 4041500 |
| 1015 | 47.22854 | -88.3854 | 4043050 |
| 1016 | 46.8041  | -88.3171 | 4043150 |
| 1017 | 45.94302 | -86.7057 | 4057510 |
| 1018 | 46.41105 | -87.6243 | 4058200 |
| 1019 | 45.90892 | -87.2135 | 4059000 |
| 1020 | 45.75497 | -87.2021 | 4059500 |
| 1021 | 46.05857 | -88.6274 | 4060500 |
| 1022 | 45.96079 | -88.316  | 4060993 |
| 1023 | 45.94745 | -88.2154 | 4062011 |
| 1024 | 45.76361 | -88.4636 | 4063700 |
| 1025 | 45.57944 | -87.7869 | 4066003 |
| 1026 | 45.48194 | -87.8022 | 4066030 |
| 1027 | 45.5     | -88      | 4066500 |
| 1028 | 45.38774 | -88.3051 | 4067958 |
| 1029 | 44.865   | -88.3    | 4071000 |
| 1030 | 44.86056 | -87.9839 | 4071765 |
| 1031 | 44.89803 | -88.8443 | 4077630 |
| 1032 | 44.72472 | -88.7361 | 4078500 |
| 1033 | 44.45833 | -87.5565 | 4085200 |
| 1034 | 43.74139 | -87.7521 | 4086000 |
| 1035 | 43.32306 | -87.9786 | 4086500 |
| 1036 | 43.28028 | -87.9425 | 4086600 |
| 1037 | 43.10001 | -87.909  | 4087000 |
| 1038 | 43.17278 | -88.1039 | 4087030 |
| 1039 | 43.04556 | -87.9997 | 4087120 |
| 1040 | 42.9975  | -87.9264 | 4087159 |
| 1041 | 42.87361 | -87.9958 | 4087220 |
| 1042 | 42.81556 | -87.9947 | 4087233 |
| 1043 | 42.75139 | -87.8236 | 4087240 |
| 1044 | 41.91338 | -86.2131 | 4101800 |
| 1045 | 42.32393 | -85.1975 | 4105500 |
| 1046 | 42.28365 | -84.4088 | 4109000 |
| 1047 | 42.72726 | -84.478  | 4112500 |
| 1048 | 42.75059 | -84.5553 | 4113000 |
| 1049 | 42.82809 | -84.7594 | 4114498 |

|      |          |          |         |
|------|----------|----------|---------|
| 1050 | 42.97198 | -85.0692 | 4116000 |
| 1051 | 42.61587 | -85.2364 | 4117500 |
| 1052 | 43.08225 | -85.5909 | 4118500 |
| 1053 | 43.46418 | -86.2326 | 4122200 |
| 1054 | 44.65667 | -85.4367 | 4126970 |
| 1055 | 44.07252 | -84.02   | 4142000 |
| 1056 | 43.01503 | -84.18   | 4144500 |
| 1057 | 43.03364 | -83.5813 | 4148140 |
| 1058 | 43.03892 | -83.7716 | 4148500 |
| 1059 | 43.62614 | -84.7078 | 4154000 |
| 1060 | 43.5953  | -84.2355 | 4156000 |
| 1061 | 42.57781 | -82.9516 | 4164000 |
| 1062 | 42.6292  | -82.8888 | 4164500 |
| 1063 | 42.59587 | -82.9088 | 4165500 |
| 1064 | 42.54587 | -83.2235 | 4166000 |
| 1065 | 42.34809 | -83.3116 | 4167000 |
| 1066 | 42.30837 | -83.2527 | 4168400 |
| 1067 | 42.28698 | -83.7338 | 4174500 |
| 1068 | 41.53227 | -84.9036 | 4177720 |
| 1069 | 41.36005 | -85.0491 | 4179520 |
| 1070 | 41.21894 | -85.0764 | 4180000 |
| 1071 | 40.69477 | -84.6466 | 4180988 |
| 1072 | 40.8481  | -84.9377 | 4181500 |
| 1073 | 40.98783 | -85.1119 | 4182000 |
| 1074 | 41.07977 | -85.0875 | 4182950 |
| 1075 | 41.08505 | -85.0222 | 4183000 |
| 1076 | 41.6595  | -84.2491 | 4184500 |
| 1077 | 41.5045  | -84.4297 | 4185000 |
| 1078 | 40.94866 | -84.2661 | 4186500 |
| 1079 | 41.05589 | -83.688  | 4189000 |
| 1080 | 41.23755 | -84.3991 | 4191500 |
| 1081 | 41.29199 | -84.2811 | 4192500 |
| 1082 | 41.4495  | -83.3613 | 4195500 |
| 1083 | 41.49116 | -83.2246 | 4195820 |
| 1084 | 40.80367 | -83.0057 | 4196000 |
| 1085 | 40.85061 | -83.2563 | 4196500 |
| 1086 | 40.92283 | -83.3488 | 4196800 |
| 1087 | 41.30783 | -83.1588 | 4198000 |
| 1088 | 41.30089 | -82.6082 | 4199000 |
| 1089 | 41.38199 | -82.3168 | 4199500 |
| 1090 | 41.38032 | -82.1046 | 4200500 |
| 1091 | 41.13561 | -81.5471 | 4206000 |
| 1092 | 41.3845  | -81.5273 | 4207200 |
| 1093 | 41.39533 | -81.6298 | 4208000 |
| 1094 | 41.63088 | -81.4034 | 4209000 |
| 1095 | 41.71893 | -81.2279 | 4212100 |
| 1096 | 42.46333 | -78.9342 | 4213500 |
| 1097 | 42.85472 | -78.755  | 4214500 |
| 1098 | 42.89    | -78.645  | 4215000 |
| 1099 | 42.82972 | -78.775  | 4215500 |

|      |          |          |         |
|------|----------|----------|---------|
| 1100 | 42.86389 | -78.2836 | 4216418 |
| 1101 | 42.9975  | -78.1886 | 4217000 |
| 1102 | 43.09306 | -78.6361 | 4218000 |
| 1103 | 42.97778 | -78.7636 | 4218518 |
| 1104 | 42.12222 | -77.9572 | 4221000 |
| 1105 | 42.57028 | -78.0422 | 4223000 |
| 1106 | 42.91778 | -77.7572 | 4228500 |
| 1107 | 42.95722 | -77.5889 | 4229500 |
| 1108 | 43.01    | -77.7914 | 4230500 |
| 1109 | 43.10056 | -77.8822 | 4231000 |
| 1110 | 42.45333 | -76.4728 | 4234000 |
| 1111 | 42.91822 | -77.2328 | 4235000 |
| 1112 | 42.98333 | -76.1508 | 4239000 |
| 1113 | 43.09756 | -75.6394 | 4243500 |
| 1114 | 43.51167 | -75.3067 | 4252500 |
| 1115 | 44.59944 | -75.3789 | 4263000 |
| 1116 | 44.86361 | -74.7789 | 4269000 |
| 1117 | 45       | -73.5008 | 4271500 |
| 1118 | 43.62423 | -73.3115 | 4280000 |
| 1119 | 43.46389 | -73.2842 | 4280450 |
| 1120 | 43.60368 | -73.0132 | 4282000 |
| 1121 | 44.25673 | -72.5934 | 4286000 |
| 1122 | 44.18256 | -72.6407 | 4287000 |
| 1123 | 44.27728 | -72.7426 | 4288000 |
| 1124 | 44.62283 | -72.6762 | 4292000 |
| 1125 | 44.97282 | -72.3854 | 4293000 |
| 1126 | 44.96005 | -72.6965 | 4293500 |
| 1127 | 44.91671 | -73.1285 | 4294000 |
| 1128 | 44.86894 | -72.2701 | 4296000 |
| 1129 | 46.84996 | -96.3295 | 5061000 |
| 1130 | 46.77552 | -96.6281 | 5061500 |
| 1131 | 47.26556 | -96.2475 | 5062500 |
| 1132 | 47.26803 | -96.7976 | 5064000 |
| 1133 | 47.61192 | -96.8148 | 5069000 |
| 1134 | 47.93193 | -97.5145 | 5082625 |
| 1135 | 48.91333 | -97.917  | 5099600 |
| 1136 | 48.37057 | -101.57  | 5116500 |
| 1137 | 45.29163 | -96.4876 | 5291000 |
| 1138 | 44.52357 | -95.1725 | 5316500 |
| 1139 | 44.631   | -91.9713 | 5369500 |
| 1140 | 44.06163 | -92.4663 | 5372995 |
| 1141 | 44.55972 | -90.615  | 5381000 |
| 1142 | 44.06028 | -91.2872 | 5382000 |
| 1143 | 43.9375  | -90.8106 | 5382325 |
| 1144 | 43.8608  | -91.2104 | 5383075 |
| 1145 | 45.23583 | -89.6497 | 5394500 |
| 1146 | 45.17833 | -89.6817 | 5395000 |
| 1147 | 44.91889 | -89.5519 | 5397500 |
| 1148 | 44.88683 | -89.6357 | 5398000 |
| 1149 | 44.82191 | -90.0796 | 5399500 |



|      |          |          |         |
|------|----------|----------|---------|
| 1150 | 44.30222 | -90.1219 | 5402000 |
| 1151 | 43.48167 | -89.6364 | 5405000 |
| 1152 | 43.13417 | -89.7322 | 5406500 |
| 1153 | 43.72167 | -90.5875 | 5407470 |
| 1154 | 43.57414 | -90.6432 | 5408000 |
| 1155 | 43.18278 | -90.8583 | 5410490 |
| 1156 | 43.20728 | -91.9503 | 5411600 |
| 1157 | 43.05419 | -91.8091 | 5411850 |
| 1158 | 42.84349 | -91.4013 | 5412020 |
| 1159 | 42.75388 | -91.369  | 5412400 |
| 1160 | 42.73999 | -91.2618 | 5412500 |
| 1161 | 42.72028 | -90.8192 | 5413500 |
| 1162 | 42.73111 | -90.6403 | 5414000 |
| 1163 | 42.46999 | -91.4487 | 5416900 |
| 1164 | 42.16433 | -90.7293 | 5418400 |
| 1165 | 42.08335 | -90.6329 | 5418500 |
| 1166 | 42.25833 | -90.285  | 5419000 |
| 1167 | 42.83609 | -92.2574 | 5420680 |
| 1168 | 41.54614 | -90.524  | 5422600 |
| 1169 | 43.64166 | -88.7207 | 5423500 |
| 1170 | 43.20889 | -89.3525 | 5427718 |
| 1171 | 42.59722 | -88.8292 | 5431486 |
| 1172 | 42.67778 | -90.1186 | 5432500 |
| 1173 | 42.78556 | -89.8611 | 5433000 |
| 1174 | 42.61231 | -89.398  | 5436500 |
| 1175 | 42.25613 | -88.8632 | 5438500 |
| 1176 | 42.19444 | -88.9989 | 5440000 |
| 1177 | 41.48892 | -90.1576 | 5447500 |
| 1178 | 42.75994 | -93.6218 | 5449500 |
| 1179 | 41.74945 | -92.1821 | 5453000 |
| 1180 | 41.70002 | -91.4877 | 5454000 |
| 1181 | 41.71835 | -91.7402 | 5454220 |
| 1182 | 41.67668 | -91.5988 | 5454300 |
| 1183 | 41.60641 | -91.6157 | 5455100 |
| 1184 | 41.46974 | -91.7146 | 5455500 |
| 1185 | 43.06219 | -92.6739 | 5457700 |
| 1186 | 43.03328 | -92.5035 | 5458000 |
| 1187 | 42.64832 | -92.4652 | 5458500 |
| 1188 | 42.62943 | -92.5435 | 5458900 |
| 1189 | 43.16496 | -93.1927 | 5459500 |
| 1190 | 42.71192 | -92.583  | 5462000 |
| 1191 | 42.572   | -92.6183 | 5463000 |
| 1192 | 42.40776 | -92.4632 | 5463500 |
| 1193 | 41.40919 | -91.2904 | 5465000 |
| 1194 | 41.18698 | -90.9674 | 5466500 |
| 1195 | 41.12892 | -90.9193 | 5467000 |
| 1196 | 42.06651 | -93.6201 | 5470000 |
| 1197 | 42.02304 | -93.6305 | 5470500 |
| 1198 | 42.00665 | -93.5955 | 5471000 |
| 1199 | 41.3557  | -92.6574 | 5471500 |

|      |          |          |         |
|------|----------|----------|---------|
| 1200 | 41.30085 | -92.2046 | 5472500 |
| 1201 | 40.75365 | -91.2771 | 5474000 |
| 1202 | 42.43248 | -93.8058 | 5481000 |
| 1203 | 41.68832 | -93.7355 | 5481950 |
| 1204 | 41.61249 | -93.6211 | 5482000 |
| 1205 | 42.35475 | -94.9903 | 5482300 |
| 1206 | 41.58943 | -94.1513 | 5484000 |
| 1207 | 41.56166 | -93.7036 | 5484650 |
| 1208 | 41.58721 | -93.7033 | 5484800 |
| 1209 | 41.61388 | -93.5455 | 5485640 |
| 1210 | 41.45791 | -93.655  | 5486000 |
| 1211 | 41.42416 | -93.5874 | 5486490 |
| 1212 | 41.33722 | -93.4863 | 5487470 |
| 1213 | 41.30055 | -93.0455 | 5488200 |
| 1214 | 41.219   | -92.9085 | 5489000 |
| 1215 | 40.39242 | -91.5979 | 5495000 |
| 1216 | 40.01893 | -91.6221 | 5497150 |
| 1217 | 40.02893 | -91.7057 | 5498150 |
| 1218 | 39.89664 | -91.5802 | 5500000 |
| 1219 | 39.817   | -91.546  | 5501000 |
| 1220 | 39.82989 | -92.2304 | 5502300 |
| 1221 | 39.52411 | -92.1278 | 5506350 |
| 1222 | 39.61233 | -91.4073 | 5508000 |
| 1223 | 39.00881 | -90.9775 | 5514500 |
| 1224 | 38.74036 | -90.6951 | 5514840 |
| 1225 | 38.80304 | -90.6285 | 5514860 |
| 1226 | 41.34032 | -86.3044 | 5516500 |
| 1227 | 41.30282 | -86.6206 | 5517000 |
| 1228 | 40.63004 | -87.7239 | 5525500 |
| 1229 | 42.34389 | -87.9411 | 5528000 |
| 1230 | 42.15194 | -87.9578 | 5528500 |
| 1231 | 42.08722 | -87.8872 | 5529000 |
| 1232 | 42.06056 | -88.0167 | 5530990 |
| 1233 | 41.88614 | -87.9592 | 5531300 |
| 1234 | 41.82583 | -87.9003 | 5531500 |
| 1235 | 41.82167 | -87.8219 | 5532500 |
| 1236 | 42.2325  | -87.8453 | 5535000 |
| 1237 | 42.01222 | -87.7958 | 5536000 |
| 1238 | 41.50781 | -87.51   | 5536179 |
| 1239 | 41.56115 | -87.4806 | 5536190 |
| 1240 | 41.5775  | -87.5222 | 5536195 |
| 1241 | 41.52087 | -87.5903 | 5536235 |
| 1242 | 41.54003 | -87.6492 | 5536255 |
| 1243 | 41.56837 | -87.6078 | 5536275 |
| 1244 | 41.60698 | -87.5978 | 5536290 |
| 1245 | 41.6142  | -87.7295 | 5536340 |
| 1246 | 41.51503 | -88.0734 | 5539000 |
| 1247 | 41.8175  | -88.1714 | 5540095 |
| 1248 | 41.83167 | -88.0478 | 5540160 |
| 1249 | 41.80194 | -88.0689 | 5540195 |

|      |          |          |         |
|------|----------|----------|---------|
| 1250 | 41.71806 | -88.0706 | 5540250 |
| 1251 | 41.52225 | -88.1926 | 5540500 |
| 1252 | 41.28614 | -88.3598 | 5542000 |
| 1253 | 43.00472 | -88.2436 | 5543830 |
| 1254 | 42.85667 | -88.3278 | 5544200 |
| 1255 | 41.93278 | -88.3408 | 5551200 |
| 1256 | 40.87781 | -88.6362 | 5554500 |
| 1257 | 41.36722 | -89.4978 | 5556500 |
| 1258 | 41.10722 | -89.3561 | 5558300 |
| 1259 | 40.70778 | -90.28   | 5569500 |
| 1260 | 40.03087 | -88.589  | 5572000 |
| 1261 | 40.47194 | -89.0281 | 5580950 |
| 1262 | 40.33032 | -90.8962 | 5584500 |
| 1263 | 40.02477 | -90.6318 | 5585000 |
| 1264 | 47.50163 | -111.932 | 6085800 |
| 1265 | 46.4288  | -109.841 | 6120500 |
| 1266 | 46.31899 | -109.461 | 6123030 |
| 1267 | 48.64949 | -109.232 | 6151500 |
| 1268 | 48.35678 | -107.582 | 6166000 |
| 1269 | 48.42031 | -107.171 | 6167500 |
| 1270 | 47.41397 | -105.576 | 6177500 |
| 1271 | 44.92818 | -110.394 | 6188000 |
| 1272 | 45.46571 | -108.844 | 6208500 |
| 1273 | 43.14278 | -108.709 | 6227600 |
| 1274 | 44.38329 | -108.036 | 6274300 |
| 1275 | 45.73569 | -107.557 | 6294000 |
| 1276 | 45.41161 | -106.457 | 6307616 |
| 1277 | 44.92693 | -105.353 | 6324970 |
| 1278 | 48.28447 | -103.573 | 6331000 |
| 1279 | 45.54813 | -103.971 | 6334500 |
| 1280 | 47.23613 | -102.77  | 6339100 |
| 1281 | 47.28612 | -101.926 | 6340000 |
| 1282 | 46.37611 | -100.934 | 6354000 |
| 1283 | 45.64869 | -102.643 | 6356500 |
| 1284 | 44.08498 | -104.06  | 6392900 |
| 1285 | 43.85887 | -104.107 | 6392950 |
| 1286 | 43.30553 | -103.821 | 6395000 |
| 1287 | 43.23997 | -103.588 | 6400000 |
| 1288 | 43.43053 | -103.476 | 6402000 |
| 1289 | 43.46665 | -103.306 | 6402500 |
| 1290 | 43.50196 | -103.074 | 6402600 |
| 1291 | 43.67241 | -102.892 | 6403700 |
| 1292 | 43.87165 | -103.336 | 6404000 |
| 1293 | 43.82805 | -103.196 | 6406000 |
| 1294 | 44.01359 | -103.83  | 6409000 |
| 1295 | 44.08471 | -103.58  | 6410500 |
| 1296 | 44.08552 | -103.242 | 6414000 |
| 1297 | 43.9421  | -102.854 | 6421500 |
| 1298 | 44.14433 | -103.455 | 6422500 |
| 1299 | 44.29471 | -103.597 | 6424000 |

|      |          |          |         |
|------|----------|----------|---------|
| 1300 | 44.32193 | -104.941 | 6426500 |
| 1301 | 44.15387 | -104.078 | 6429500 |
| 1302 | 44.5719  | -104.054 | 6430500 |
| 1303 | 44.29922 | -103.868 | 6430770 |
| 1304 | 44.34969 | -103.936 | 6430850 |
| 1305 | 44.66721 | -103.839 | 6433000 |
| 1306 | 44.44221 | -103.629 | 6436180 |
| 1307 | 44.54176 | -103.572 | 6436190 |
| 1308 | 44.33554 | -103.635 | 6437020 |
| 1309 | 44.36999 | -102.567 | 6438000 |
| 1310 | 43.96902 | -101.767 | 6440200 |
| 1311 | 44.32665 | -100.384 | 6441500 |
| 1312 | 43.69388 | -101.933 | 6446500 |
| 1313 | 43.53667 | -101.799 | 6446700 |
| 1314 | 43.75249 | -101.525 | 6447000 |
| 1315 | 43.75527 | -101.228 | 6447230 |
| 1316 | 43.71305 | -100.685 | 6447450 |
| 1317 | 43.1007  | -101.232 | 6449100 |
| 1318 | 43.60139 | -100.75  | 6450500 |
| 1319 | 43.74833 | -99.5565 | 6452000 |
| 1320 | 42.81111 | -98.1758 | 6453600 |
| 1321 | 42.73972 | -98.2228 | 6465500 |
| 1322 | 42.73222 | -97.9225 | 6466500 |
| 1323 | 43.41562 | -97.2052 | 6478690 |
| 1324 | 43.61636 | -96.5653 | 6482610 |
| 1325 | 42.14806 | -96.4833 | 6600900 |
| 1326 | 42.32167 | -96.4878 | 6601000 |
| 1327 | 43.12803 | -95.2108 | 6605000 |
| 1328 | 42.48222 | -95.7926 | 6606600 |
| 1329 | 42.15693 | -95.81   | 6607200 |
| 1330 | 41.83054 | -95.9314 | 6608500 |
| 1331 | 41.64161 | -95.7822 | 6609500 |
| 1332 | 41.20542 | -96.0167 | 6610770 |
| 1333 | 41.11783 | -95.9377 | 6610795 |
| 1334 | 39.43832 | -104.983 | 6709000 |
| 1335 | 39.63249 | -105.015 | 6710247 |
| 1336 | 39.35582 | -104.763 | 6712000 |
| 1337 | 39.74249 | -105     | 6713500 |
| 1338 | 39.74888 | -105.4   | 6718550 |
| 1339 | 39.75304 | -105.235 | 6719505 |
| 1340 | 40.11609 | -104.819 | 6721000 |
| 1341 | 40.37859 | -105.061 | 6741510 |
| 1342 | 40.58808 | -105.069 | 6752260 |
| 1343 | 40.2684  | -103.801 | 6759500 |
| 1344 | 40.65806 | -99.0861 | 6770200 |
| 1345 | 41.3289  | -97.6753 | 6773500 |
| 1346 | 41.77861 | -100.525 | 6775900 |
| 1347 | 41.0325  | -98.7406 | 6784000 |
| 1348 | 41.2035  | -98.4461 | 6785000 |
| 1349 | 41.77694 | -99.3792 | 6786000 |

|      |          |          |         |
|------|----------|----------|---------|
| 1350 | 41.26335 | -98.4492 | 6790500 |
| 1351 | 41.41861 | -97.7236 | 6793000 |
| 1352 | 41.4414  | -97.7348 | 6794000 |
| 1353 | 41.52611 | -97.2817 | 6795500 |
| 1354 | 42.00378 | -97.426  | 6799000 |
| 1355 | 42.1485  | -97.4785 | 6799100 |
| 1356 | 41.83944 | -96.7275 | 6799350 |
| 1357 | 41.71278 | -96.5219 | 6799500 |
| 1358 | 41.56117 | -96.5408 | 6800000 |
| 1359 | 40.65778 | -96.6656 | 6803000 |
| 1360 | 40.77028 | -96.7189 | 6803080 |
| 1361 | 40.7675  | -96.797  | 6803093 |
| 1362 | 40.81081 | -96.8061 | 6803170 |
| 1363 | 40.85528 | -96.7794 | 6803486 |
| 1364 | 40.84667 | -96.6817 | 6803500 |
| 1365 | 40.89306 | -96.6817 | 6803510 |
| 1366 | 40.88611 | -96.6242 | 6803513 |
| 1367 | 40.85694 | -96.5953 | 6803520 |
| 1368 | 41.01583 | -96.5442 | 6803530 |
| 1369 | 40.96556 | -96.4544 | 6803555 |
| 1370 | 41.1475  | -96.5378 | 6804000 |
| 1371 | 41.05361 | -96.3678 | 6804700 |
| 1372 | 40.79417 | -95.9114 | 6806500 |
| 1373 | 41.38999 | -95.3717 | 6807410 |
| 1374 | 40.87305 | -95.5803 | 6808500 |
| 1375 | 41.3461  | -95.0769 | 6809210 |
| 1376 | 41.0086  | -95.2417 | 6809500 |
| 1377 | 40.39278 | -95.8128 | 6811500 |
| 1378 | 40.33918 | -95.4059 | 6813000 |
| 1379 | 39.94778 | -96.1086 | 6814000 |
| 1380 | 40.03556 | -95.5961 | 6815000 |
| 1381 | 40.74328 | -95.0142 | 6817000 |
| 1382 | 39.75325 | -94.8568 | 6818000 |
| 1383 | 40.66054 | -94.7166 | 6819185 |
| 1384 | 40.3455  | -94.8322 | 6819500 |
| 1385 | 39.68803 | -94.7026 | 6820500 |
| 1386 | 39.38806 | -94.5791 | 6821150 |
| 1387 | 39.40097 | -94.7268 | 6821190 |
| 1388 | 40.03944 | -101.867 | 6823500 |
| 1389 | 40.35167 | -101.124 | 6834000 |
| 1390 | 40.14584 | -100.673 | 6836500 |
| 1391 | 40.00167 | -99.9929 | 6845110 |
| 1392 | 40.11833 | -99.5169 | 6847500 |
| 1393 | 39.9787  | -99.4787 | 6848500 |
| 1394 | 39.99251 | -97.9325 | 6853500 |
| 1395 | 39.89918 | -98.2503 | 6853800 |
| 1396 | 39.58861 | -97.6584 | 6856000 |
| 1397 | 39.35555 | -97.1275 | 6856600 |
| 1398 | 38.79474 | -100.858 | 6860000 |
| 1399 | 38.80779 | -100.023 | 6861000 |

|      |          |          |         |
|------|----------|----------|---------|
| 1400 | 38.85223 | -99.3182 | 6863500 |
| 1401 | 39.10612 | -99.8701 | 6866900 |
| 1402 | 39.00389 | -97.8739 | 6869500 |
| 1403 | 38.84445 | -97.6684 | 6869950 |
| 1404 | 38.86389 | -97.4834 | 6870200 |
| 1405 | 39.67307 | -99.3095 | 6871000 |
| 1406 | 39.55945 | -99.2859 | 6871500 |
| 1407 | 39.55501 | -98.6923 | 6872500 |
| 1408 | 39.43973 | -99.1018 | 6873460 |
| 1409 | 39.42779 | -98.6942 | 6874000 |
| 1410 | 39.13917 | -97.837  | 6876700 |
| 1411 | 38.96917 | -97.4773 | 6876900 |
| 1412 | 38.90639 | -97.1178 | 6877600 |
| 1413 | 39.03111 | -97.0403 | 6878000 |
| 1414 | 40.73112 | -97.1775 | 6880800 |
| 1415 | 40.59667 | -96.9606 | 6881000 |
| 1416 | 40.04472 | -96.5872 | 6882000 |
| 1417 | 39.84195 | -96.6622 | 6882510 |
| 1418 | 40.3325  | -98.0669 | 6883000 |
| 1419 | 40.14647 | -97.2007 | 6884000 |
| 1420 | 39.98028 | -97.0047 | 6884025 |
| 1421 | 39.81361 | -97.0375 | 6884200 |
| 1422 | 39.72584 | -96.8047 | 6884400 |
| 1423 | 39.68194 | -96.4428 | 6885500 |
| 1424 | 39.23722 | -96.5714 | 6887000 |
| 1425 | 39.19305 | -96.1475 | 6888350 |
| 1426 | 39.06472 | -96.1692 | 6888500 |
| 1427 | 39.06667 | -95.6497 | 6889000 |
| 1428 | 39.23833 | -95.8886 | 6889200 |
| 1429 | 39.09944 | -95.725  | 6889500 |
| 1430 | 39.52139 | -95.5328 | 6890100 |
| 1431 | 38.91139 | -95.2611 | 6891500 |
| 1432 | 39.11639 | -95.0108 | 6892000 |
| 1433 | 38.81251 | -94.6758 | 6893080 |
| 1434 | 38.88942 | -94.5807 | 6893150 |
| 1435 | 38.94056 | -94.6713 | 6893300 |
| 1436 | 38.93833 | -94.6078 | 6893390 |
| 1437 | 38.957   | -94.5589 | 6893500 |
| 1438 | 39.03308 | -94.6054 | 6893557 |
| 1439 | 39.05834 | -94.5119 | 6893578 |
| 1440 | 39.10056 | -94.3005 | 6894000 |
| 1441 | 39.92695 | -93.9427 | 6897500 |
| 1442 | 40.64028 | -93.8083 | 6898000 |
| 1443 | 40.06931 | -93.638  | 6899500 |
| 1444 | 39.64003 | -93.2737 | 6902000 |
| 1445 | 40.95189 | -93.2598 | 6903400 |
| 1446 | 40.80056 | -93.1924 | 6903700 |
| 1447 | 40.23433 | -92.6864 | 6904500 |
| 1448 | 39.53994 | -92.7908 | 6905500 |
| 1449 | 38.70225 | -92.9788 | 6906800 |

|      |          |          |         |
|------|----------|----------|---------|
| 1450 | 38.87001 | -93.6222 | 6907700 |
| 1451 | 38.99224 | -93.1969 | 6908000 |
| 1452 | 39.12083 | -92.5672 | 6909500 |
| 1453 | 38.91722 | -92.7042 | 6909950 |
| 1454 | 38.92775 | -92.3399 | 6910230 |
| 1455 | 38.52903 | -92.192  | 6910750 |
| 1456 | 38.56696 | -95.9617 | 6910800 |
| 1457 | 38.6014  | -95.6847 | 6911490 |
| 1458 | 38.70917 | -95.8383 | 6911900 |
| 1459 | 38.61807 | -95.2683 | 6913500 |
| 1460 | 38.3453  | -94.7725 | 6915800 |
| 1461 | 38.00892 | -94.7041 | 6917000 |
| 1462 | 37.99481 | -94.3693 | 6917060 |
| 1463 | 37.86472 | -94.5822 | 6917560 |
| 1464 | 37.86203 | -94.3993 | 6918060 |
| 1465 | 37.26639 | -93.2495 | 6918493 |
| 1466 | 37.73589 | -93.7797 | 6919020 |
| 1467 | 37.8342  | -93.8755 | 6919500 |
| 1468 | 37.86983 | -93.8032 | 6919900 |
| 1469 | 37.68267 | -93.3703 | 6921070 |
| 1470 | 37.75047 | -93.2662 | 6921200 |
| 1471 | 38.55498 | -93.9654 | 6921720 |
| 1472 | 37.68421 | -92.9243 | 6923250 |
| 1473 | 37.93694 | -92.8514 | 6923950 |
| 1474 | 38.43181 | -91.9886 | 6927000 |
| 1475 | 37.75921 | -92.4518 | 6928000 |
| 1476 | 37.60108 | -92.2338 | 6928300 |
| 1477 | 37.66564 | -92.0499 | 6930000 |
| 1478 | 37.76025 | -92.058  | 6930060 |
| 1479 | 37.90953 | -91.9033 | 6932000 |
| 1480 | 37.92992 | -91.9773 | 6933500 |
| 1481 | 38.38881 | -91.8199 | 6934000 |
| 1482 | 37.99847 | -91.3609 | 7013000 |
| 1483 | 38.15853 | -91.1085 | 7014500 |
| 1484 | 38.14692 | -91.5809 | 7015720 |
| 1485 | 38.44414 | -90.9955 | 7016500 |
| 1486 | 38.39172 | -90.6378 | 7018500 |
| 1487 | 38.50473 | -90.5909 | 7019000 |
| 1488 | 36.40531 | -88.8548 | 7025400 |
| 1489 | 35.31095 | -89.6396 | 7030240 |
| 1490 | 35.05426 | -89.5412 | 7030500 |
| 1491 | 35.11648 | -89.8015 | 7031650 |
| 1492 | 35.04981 | -89.819  | 7032200 |
| 1493 | 37.55937 | -90.3129 | 7035000 |
| 1494 | 37.50242 | -90.4579 | 7035800 |
| 1495 | 37.19453 | -90.5033 | 7037500 |
| 1496 | 36.42722 | -93.6208 | 7050500 |
| 1497 | 37.17794 | -93.1984 | 7050690 |
| 1498 | 37.14997 | -93.2034 | 7050700 |
| 1499 | 37.18697 | -93.3313 | 7052000 |

|      |          |          |         |
|------|----------|----------|---------|
| 1500 | 37.16853 | -93.3703 | 7052100 |
| 1501 | 37.15364 | -93.3628 | 7052120 |
| 1502 | 37.14714 | -93.3755 | 7052152 |
| 1503 | 37.11775 | -93.4039 | 7052160 |
| 1504 | 36.97489 | -93.3279 | 7052345 |
| 1505 | 36.80539 | -93.4616 | 7052500 |
| 1506 | 36.75062 | -93.6185 | 7052820 |
| 1507 | 36.71775 | -93.2068 | 7053810 |
| 1508 | 36.77964 | -92.9073 | 7054080 |
| 1509 | 35.98306 | -92.7472 | 7056000 |
| 1510 | 36.62722 | -92.3061 | 7058000 |
| 1511 | 36.11667 | -92.1431 | 7060500 |
| 1512 | 35.76028 | -91.6411 | 7061000 |
| 1513 | 37.33814 | -90.7888 | 7061500 |
| 1514 | 37.05616 | -91.6682 | 7065200 |
| 1515 | 37.14817 | -91.4431 | 7065495 |
| 1516 | 37.15408 | -91.3582 | 7066000 |
| 1517 | 36.99139 | -91.0135 | 7067000 |
| 1518 | 36.622   | -90.8476 | 7068000 |
| 1519 | 36.20556 | -91.1717 | 7069500 |
| 1520 | 36.34639 | -91.1142 | 7072000 |
| 1521 | 36.1025  | -91.0978 | 7072500 |
| 1522 | 38.48722 | -105.374 | 7094500 |
| 1523 | 38.81638 | -104.823 | 7105500 |
| 1524 | 38.42944 | -104.598 | 7106300 |
| 1525 | 38.28778 | -104.601 | 7106500 |
| 1526 | 38.24556 | -104.486 | 7108900 |
| 1527 | 38.24806 | -104.399 | 7109500 |
| 1528 | 37.12946 | -104.64  | 7124200 |
| 1529 | 38.03422 | -103.201 | 7128500 |
| 1530 | 38.10579 | -102.618 | 7133000 |
| 1531 | 38.02751 | -102.012 | 7137500 |
| 1532 | 37.96612 | -101.757 | 7138000 |
| 1533 | 38.47724 | -99.4382 | 7141780 |
| 1534 | 38.46168 | -99.0148 | 7141900 |
| 1535 | 38.30834 | -98.192  | 7143300 |
| 1536 | 38.11223 | -97.592  | 7143665 |
| 1537 | 38.02862 | -97.5406 | 7143672 |
| 1538 | 37.88307 | -97.4245 | 7144100 |
| 1539 | 37.6378  | -98.7209 | 7144910 |
| 1540 | 37.56168 | -97.8531 | 7145200 |
| 1541 | 37.45696 | -97.4239 | 7145500 |
| 1542 | 37.24947 | -97.4037 | 7145700 |
| 1543 | 37.03751 | -97.0392 | 7146500 |
| 1544 | 37.22392 | -96.9961 | 7147800 |
| 1545 | 36.81503 | -98.6481 | 7148400 |
| 1546 | 37.12891 | -97.602  | 7151500 |
| 1547 | 36.81142 | -97.2773 | 7152000 |
| 1548 | 36.34367 | -96.7995 | 7153000 |
| 1549 | 37.01114 | -100.492 | 7156900 |



|      |          |          |         |
|------|----------|----------|---------|
| 1550 | 37.03253 | -100.211 | 7157500 |
| 1551 | 36.85197 | -99.3154 | 7157950 |
| 1552 | 36.51726 | -98.8795 | 7158000 |
| 1553 | 35.95171 | -97.9145 | 7159100 |
| 1554 | 36.07565 | -95.9606 | 7164600 |
| 1555 | 36.01704 | -95.8489 | 7165562 |
| 1556 | 37.50838 | -95.8336 | 7169500 |
| 1557 | 37.3756  | -96.1855 | 7169800 |
| 1558 | 37.22368 | -95.6778 | 7170500 |
| 1559 | 36.8512  | -95.5861 | 7171000 |
| 1560 | 36.50898 | -95.8419 | 7175500 |
| 1561 | 36.48509 | -96.0603 | 7176500 |
| 1562 | 36.27843 | -95.9542 | 7177500 |
| 1563 | 36.24871 | -95.8672 | 7178000 |
| 1564 | 38.46696 | -96.2506 | 7179730 |
| 1565 | 38.39751 | -96.3561 | 7182250 |
| 1566 | 37.92226 | -95.4278 | 7183000 |
| 1567 | 37.34006 | -95.11   | 7183500 |
| 1568 | 37.28117 | -95.0327 | 7184000 |
| 1569 | 36.92868 | -94.9575 | 7185000 |
| 1570 | 37.18864 | -94.3259 | 7185765 |
| 1571 | 37.24561 | -94.5664 | 7186000 |
| 1572 | 37.02058 | -94.5138 | 7187000 |
| 1573 | 36.93451 | -94.7472 | 7188000 |
| 1574 | 36.61586 | -94.1822 | 7188653 |
| 1575 | 36.58396 | -94.3733 | 7188838 |
| 1576 | 36.13008 | -94.5722 | 7195500 |
| 1577 | 35.92287 | -94.9236 | 7196500 |
| 1578 | 35.57315 | -95.0688 | 7198000 |
| 1579 | 36.68103 | -104.786 | 7203000 |
| 1580 | 36.51983 | -104.979 | 7207000 |
| 1581 | 36.29757 | -104.495 | 7211500 |
| 1582 | 35.94512 | -105.256 | 7215500 |
| 1583 | 35.65483 | -104.379 | 7221500 |
| 1584 | 35.34439 | -103.39  | 7227100 |
| 1585 | 35.47033 | -101.88  | 7227500 |
| 1586 | 35.54366 | -98.3178 | 7228500 |
| 1587 | 35.01396 | -97.3475 | 7229200 |
| 1588 | 35.17257 | -96.932  | 7230500 |
| 1589 | 34.96536 | -96.5125 | 7231000 |
| 1590 | 34.97787 | -96.2436 | 7231500 |
| 1591 | 36.18337 | -98.9212 | 7238000 |
| 1592 | 35.81199 | -98.4209 | 7239300 |
| 1593 | 35.56311 | -97.9575 | 7239500 |
| 1594 | 35.5395  | -97.7425 | 7239700 |
| 1595 | 35.56561 | -97.3673 | 7241520 |
| 1596 | 35.50034 | -97.1939 | 7241550 |
| 1597 | 35.57694 | -94.0153 | 7252000 |
| 1598 | 34.4825  | -89.2244 | 7268000 |
| 1599 | 34.27333 | -89.5214 | 7274000 |

|      |          |          |         |
|------|----------|----------|---------|
| 1600 | 34.9075  | -89.7533 | 7275900 |
| 1601 | 33.97361 | -89.3478 | 7283000 |
| 1602 | 33.54734 | -90.5431 | 7288500 |
| 1603 | 33.19444 | -89.7711 | 7289350 |
| 1604 | 32.60306 | -90.3639 | 7289730 |
| 1605 | 31.32472 | -91.1094 | 7292500 |
| 1606 | 31.22694 | -91.2956 | 7295000 |
| 1607 | 34.56923 | -100.194 | 7299540 |
| 1608 | 34.95755 | -100.221 | 7300000 |
| 1609 | 34.63813 | -99.1037 | 7305000 |
| 1610 | 34.36231 | -98.2825 | 7311000 |
| 1611 | 34.22092 | -98.4531 | 7311500 |
| 1612 | 35.62644 | -99.6684 | 7316500 |
| 1613 | 35.53088 | -98.967  | 7325000 |
| 1614 | 35.11728 | -98.564  | 7325500 |
| 1615 | 34.9634  | -97.8995 | 7327550 |
| 1616 | 33.99704 | -96.2411 | 7332500 |
| 1617 | 34.27149 | -95.9122 | 7334000 |
| 1618 | 34.57482 | -95.3408 | 7335790 |
| 1619 | 34.24871 | -95.6052 | 7336200 |
| 1620 | 33.55194 | -94.0411 | 7337000 |
| 1621 | 34.09761 | -94.9022 | 7337900 |
| 1622 | 34.04178 | -94.6199 | 7339000 |
| 1623 | 33.96222 | -94.0617 | 7341200 |
| 1624 | 34.56778 | -92.6103 | 7363000 |
| 1625 | 30.61602 | -90.2487 | 7375000 |
| 1626 | 31.01222 | -90.4611 | 7375280 |
| 1627 | 30.50658 | -90.3618 | 7375500 |
| 1628 | 30.93074 | -90.6734 | 7375800 |
| 1629 | 30.5038  | -90.6773 | 7376000 |
| 1630 | 30.50436 | -90.5459 | 7376500 |
| 1631 | 30.88907 | -90.8445 | 7377000 |
| 1632 | 30.75657 | -91.044  | 7377500 |
| 1633 | 30.51269 | -91.0737 | 7378000 |
| 1634 | 30.46408 | -90.9904 | 7378500 |
| 1635 | 30.48289 | -92.4907 | 8010000 |
| 1636 | 30.64048 | -92.814  | 8013500 |
| 1637 | 30.69875 | -92.8932 | 8014500 |
| 1638 | 33.13289 | -96.0769 | 8017200 |
| 1639 | 32.8979  | -96.2533 | 8017300 |
| 1640 | 32.76318 | -95.463  | 8019000 |
| 1641 | 30.95297 | -93.3529 | 8028000 |
| 1642 | 30.81889 | -93.7856 | 8029500 |
| 1643 | 30.18632 | -93.9085 | 8031000 |
| 1644 | 32.74041 | -97.652  | 8045850 |
| 1645 | 32.69513 | -97.4472 | 8047050 |
| 1646 | 32.73235 | -97.3589 | 8047500 |
| 1647 | 32.60347 | -97.265  | 8048970 |
| 1648 | 33.33623 | -97.1795 | 8051500 |
| 1649 | 32.96596 | -96.9445 | 8055500 |

|      |          |          |         |
|------|----------|----------|---------|
| 1650 | 32.77485 | -96.8219 | 8057000 |
| 1651 | 32.88929 | -96.7567 | 8057200 |
| 1652 | 32.95984 | -96.6144 | 8061540 |
| 1653 | 32.14765 | -96.1025 | 8062700 |
| 1654 | 30.88472 | -95.7778 | 8065800 |
| 1655 | 30.71631 | -94.9588 | 8066200 |
| 1656 | 30.24466 | -95.4572 | 8068000 |
| 1657 | 30.14117 | -95.3382 | 8068090 |
| 1658 | 30.11994 | -95.6461 | 8068275 |
| 1659 | 30.1105  | -95.4363 | 8068500 |
| 1660 | 30.03578 | -95.4288 | 8069000 |
| 1661 | 30.3366  | -95.1041 | 8070000 |
| 1662 | 30.14523 | -95.1246 | 8070200 |
| 1663 | 30.25966 | -95.3024 | 8070500 |
| 1664 | 30.23271 | -95.1683 | 8071000 |
| 1665 | 29.86717 | -95.6466 | 8072760 |
| 1666 | 29.76217 | -95.5577 | 8073600 |
| 1667 | 29.7469  | -95.5236 | 8073700 |
| 1668 | 29.77523 | -95.3972 | 8074500 |
| 1669 | 29.69717 | -95.4122 | 8075000 |
| 1670 | 33.58093 | -99.2676 | 8082500 |
| 1671 | 32.78761 | -100.389 | 8083100 |
| 1672 | 32.69012 | -99.6695 | 8084000 |
| 1673 | 32.93094 | -99.6426 | 8084800 |
| 1674 | 32.93298 | -99.2154 | 8085500 |
| 1675 | 32.7329  | -99.1406 | 8086212 |
| 1676 | 32.64846 | -99.0045 | 8086290 |
| 1677 | 32.25903 | -97.7025 | 8091000 |
| 1678 | 32.15071 | -97.4028 | 8092000 |
| 1679 | 31.81238 | -97.2978 | 8093100 |
| 1680 | 31.78599 | -97.5681 | 8095000 |
| 1681 | 31.66961 | -97.4695 | 8095200 |
| 1682 | 31.536   | -97.0733 | 8096500 |
| 1683 | 32.11403 | -98.6056 | 8099300 |
| 1684 | 30.62687 | -96.5441 | 8108700 |
| 1685 | 30.9738  | -96.2416 | 8110800 |
| 1686 | 32.57372 | -100.908 | 8120500 |
| 1687 | 32.39262 | -100.879 | 8121000 |
| 1688 | 32.19929 | -101.014 | 8123800 |
| 1689 | 32.05374 | -100.762 | 8123850 |
| 1690 | 31.71543 | -100.026 | 8126380 |
| 1691 | 31.74932 | -99.9479 | 8127000 |
| 1692 | 31.45461 | -100.411 | 8136000 |
| 1693 | 31.51599 | -99.9195 | 8136500 |
| 1694 | 31.51739 | -98.7406 | 8143600 |
| 1695 | 30.91906 | -99.7856 | 8144500 |
| 1696 | 31.13822 | -99.3351 | 8145000 |
| 1697 | 31.21322 | -98.7195 | 8146000 |
| 1698 | 30.50435 | -99.7345 | 8150000 |
| 1699 | 30.66074 | -99.1092 | 8150700 |

|      |          |          |         |
|------|----------|----------|---------|
| 1700 | 30.64352 | -99.0959 | 8150800 |
| 1701 | 30.75129 | -98.6698 | 8151500 |
| 1702 | 30.55769 | -98.4723 | 8152000 |
| 1703 | 30.22048 | -98.8698 | 8152900 |
| 1704 | 30.08299 | -98.0078 | 8158700 |
| 1705 | 30.17799 | -97.6886 | 8159000 |
| 1706 | 30.01272 | -97.1619 | 8159500 |
| 1707 | 29.91245 | -96.9039 | 8160400 |
| 1708 | 29.79912 | -96.5322 | 8160800 |
| 1709 | 28.97415 | -96.0125 | 8162500 |
| 1710 | 28.92804 | -96.1711 | 8162600 |
| 1711 | 28.95998 | -96.6864 | 8164000 |
| 1712 | 29.46691 | -96.8128 | 8164300 |
| 1713 | 29.06554 | -96.6741 | 8164390 |
| 1714 | 29.16025 | -96.5464 | 8164450 |
| 1715 | 29.07186 | -96.468  | 8164503 |
| 1716 | 29.07081 | -96.4172 | 8164504 |
| 1717 | 28.89138 | -96.8191 | 8164600 |
| 1718 | 30.06993 | -99.3217 | 8165500 |
| 1719 | 30.05327 | -99.1634 | 8166200 |
| 1720 | 29.96524 | -98.8972 | 8167000 |
| 1721 | 29.8605  | -98.3836 | 8167500 |
| 1722 | 29.70641 | -98.1222 | 8169000 |
| 1723 | 29.99438 | -98.0889 | 8171000 |
| 1724 | 29.66634 | -97.6508 | 8172000 |
| 1725 | 29.69967 | -97.6036 | 8173000 |
| 1726 | 29.4844  | -97.4503 | 8173900 |
| 1727 | 29.21525 | -97.4494 | 8175000 |
| 1728 | 28.79305 | -97.013  | 8176500 |
| 1729 | 28.86165 | -97.2264 | 8176900 |
| 1730 | 28.7311  | -97.1386 | 8177500 |
| 1731 | 29.51606 | -98.4311 | 8178700 |
| 1732 | 29.32996 | -98.5842 | 8181480 |
| 1733 | 29.26413 | -98.4908 | 8181500 |
| 1734 | 29.22219 | -98.3558 | 8181800 |
| 1735 | 29.11    | -98.1744 | 8183200 |
| 1736 | 28.95164 | -98.0642 | 8183500 |
| 1737 | 29.27972 | -98.0533 | 8185500 |
| 1738 | 29.01414 | -97.9303 | 8186000 |
| 1739 | 28.64929 | -97.3849 | 8188500 |
| 1740 | 28.30362 | -97.1125 | 8189200 |
| 1741 | 28.29195 | -97.2792 | 8189500 |
| 1742 | 28.2825  | -97.6208 | 8189700 |
| 1743 | 29.57003 | -99.2477 | 8200000 |
| 1744 | 29.57328 | -99.4031 | 8201500 |
| 1745 | 28.62221 | -98.2814 | 8208000 |
| 1746 | 27.9378  | -97.7758 | 8211200 |
| 1747 | 27.71142 | -97.5019 | 8211520 |
| 1748 | 36.37933 | -105.668 | 8276300 |
| 1749 | 36.32003 | -105.754 | 8276500 |

|      |          |          |         |
|------|----------|----------|---------|
| 1750 | 36.21086 | -105.914 | 8279000 |
| 1751 | 36.20556 | -105.964 | 8279500 |
| 1752 | 36.31882 | -106.6   | 8286500 |
| 1753 | 35.8745  | -106.142 | 8313000 |
| 1754 | 35.66198 | -106.743 | 8324000 |
| 1755 | 35.08917 | -106.681 | 8330000 |
| 1756 | 35.60089 | -107.167 | 8334000 |
| 1757 | 35.70835 | -105.683 | 8378500 |
| 1758 | 35.17867 | -105.109 | 8379500 |
| 1759 | 35.65199 | -105.319 | 8380500 |
| 1760 | 35.18196 | -104.9   | 8382500 |
| 1761 | 34.73008 | -104.525 | 8383500 |
| 1762 | 33.57186 | -104.374 | 8386000 |
| 1763 | 33.32669 | -105.625 | 8387000 |
| 1764 | 33.34917 | -104.852 | 8390500 |
| 1765 | 32.98931 | -104.321 | 8395500 |
| 1766 | 32.84086 | -104.324 | 8396500 |
| 1767 | 32.68938 | -104.299 | 8399500 |
| 1768 | 32.40928 | -104.215 | 8405200 |
| 1769 | 32.22909 | -104.152 | 8405500 |
| 1770 | 32.20754 | -104.024 | 8406500 |
| 1771 | 32.07519 | -104.039 | 8407500 |
| 1772 | 32.02314 | -104.054 | 8408500 |
| 1773 | 30.45212 | -101.733 | 8447020 |
| 1774 | 40.12082 | -105.901 | 9019500 |
| 1775 | 39.90999 | -105.878 | 9026500 |
| 1776 | 40.10832 | -106.004 | 9034250 |
| 1777 | 40.03593 | -106.205 | 9038500 |
| 1778 | 39.56665 | -106.049 | 9046600 |
| 1779 | 39.62554 | -106.066 | 9050700 |
| 1780 | 39.63971 | -106.04  | 9051050 |
| 1781 | 39.23264 | -107.228 | 9081600 |
| 1782 | 39.18361 | -108.268 | 9105000 |
| 1783 | 38.66444 | -106.848 | 9112500 |
| 1784 | 38.9847  | -107.855 | 9143000 |
| 1785 | 38.90165 | -107.921 | 9143500 |
| 1786 | 38.75304 | -108.078 | 9144250 |
| 1787 | 38.17777 | -107.758 | 9147000 |
| 1788 | 38.98332 | -108.451 | 9152500 |
| 1789 | 38.35693 | -108.833 | 9171100 |
| 1790 | 38.81054 | -109.293 | 9180500 |
| 1791 | 42.02097 | -110.05  | 9211200 |
| 1792 | 40.26426 | -106.892 | 9237450 |
| 1793 | 40.28654 | -106.829 | 9237500 |
| 1794 | 40.48299 | -106.832 | 9239500 |
| 1795 | 40.5147  | -106.954 | 9242500 |
| 1796 | 40.54902 | -108.424 | 9260000 |
| 1797 | 40.30023 | -110.602 | 9277500 |
| 1798 | 40.17969 | -108.565 | 9306290 |
| 1799 | 39.26444 | -110.343 | 9314500 |

|      |          |          |         |
|------|----------|----------|---------|
| 1800 | 37.26553 | -107.011 | 9342500 |
| 1801 | 36.7225  | -108.202 | 9364500 |
| 1802 | 36.72302 | -108.226 | 9365000 |
| 1803 | 36.77667 | -108.683 | 9368000 |
| 1804 | 37.15068 | -109.867 | 9379500 |
| 1805 | 34.31449 | -109.362 | 9384000 |
| 1806 | 34.45059 | -109.362 | 9385700 |
| 1807 | 35.10028 | -108.752 | 9386950 |
| 1808 | 34.78281 | -110.044 | 9394500 |
| 1809 | 34.8978  | -110.163 | 9397000 |
| 1810 | 35.01169 | -110.651 | 9400350 |
| 1811 | 36.10499 | -111.202 | 9401260 |
| 1812 | 36.21947 | -112.69  | 9404110 |
| 1813 | 37.2097  | -112.979 | 9405500 |
| 1814 | 37.20415 | -113.181 | 9406000 |
| 1815 | 37.16276 | -113.395 | 9408150 |
| 1816 | 37.07526 | -113.593 | 9413000 |
| 1817 | 36.89164 | -113.924 | 9415000 |
| 1818 | 36.71108 | -114.695 | 9416000 |
| 1819 | 34.46252 | -113.624 | 9424450 |
| 1820 | 34.30585 | -113.347 | 9424900 |
| 1821 | 34.23085 | -113.609 | 9426000 |
| 1822 | 33.0615  | -108.537 | 9430500 |
| 1823 | 32.72694 | -108.676 | 9431500 |
| 1824 | 32.64818 | -108.846 | 9432000 |
| 1825 | 32.72444 | -109.099 | 9439000 |
| 1826 | 33.24717 | -108.88  | 9444000 |
| 1827 | 33.04951 | -109.296 | 9444500 |
| 1828 | 33.06451 | -109.442 | 9447000 |
| 1829 | 32.95562 | -109.531 | 9447800 |
| 1830 | 32.88272 | -109.48  | 9448500 |
| 1831 | 33.18561 | -110.22  | 9466500 |
| 1832 | 33.29645 | -110.451 | 9468500 |
| 1833 | 31.3801  | -110.111 | 9470500 |
| 1834 | 31.75092 | -110.201 | 9471550 |
| 1835 | 32.84423 | -110.63  | 9473000 |
| 1836 | 33.10284 | -110.977 | 9474000 |
| 1837 | 31.61287 | -111.041 | 9481740 |
| 1838 | 32.31472 | -110.811 | 9484000 |
| 1839 | 32.35118 | -111.095 | 9486500 |
| 1840 | 32.47146 | -111.308 | 9486520 |
| 1841 | 33.98588 | -110.281 | 9496500 |
| 1842 | 33.82783 | -110.856 | 9497980 |
| 1843 | 33.61949 | -110.922 | 9498500 |
| 1844 | 33.98004 | -111.303 | 9499000 |
| 1845 | 34.56308 | -112.445 | 9503000 |
| 1846 | 34.89502 | -112.343 | 9503700 |
| 1847 | 34.85224 | -112.066 | 9504000 |
| 1848 | 34.86168 | -111.762 | 9504420 |
| 1849 | 34.76446 | -111.891 | 9504500 |

|      |          |          |          |
|------|----------|----------|----------|
| 1850 | 34.67474 | -111.672 | 9505200  |
| 1851 | 34.72863 | -111.776 | 9505350  |
| 1852 | 33.69421 | -111.542 | 9510200  |
| 1853 | 33.43949 | -111.961 | 9512165  |
| 1854 | 33.88726 | -111.954 | 9512280  |
| 1855 | 34.01559 | -112.168 | 9512800  |
| 1856 | 33.34726 | -112.726 | 9517000  |
| 1857 | 41.57549 | -111.855 | 10105900 |
| 1858 | 41.62355 | -111.739 | 10113500 |
| 1859 | 40.73523 | -111.476 | 10129900 |
| 1860 | 40.68745 | -111.534 | 10133600 |
| 1861 | 40.72384 | -111.52  | 10133650 |
| 1862 | 41.13689 | -111.832 | 10136500 |
| 1863 | 41.26855 | -111.674 | 10137500 |
| 1864 | 41.27828 | -112.092 | 10141000 |
| 1865 | 40.04968 | -111.548 | 10150500 |
| 1866 | 40.23773 | -111.699 | 10163000 |
| 1867 | 40.73356 | -111.923 | 10171000 |
| 1868 | 37.6722  | -113.035 | 10242000 |
| 1869 | 34.57305 | -117.321 | 10261500 |
| 1870 | 39.15246 | -119.099 | 10301500 |
| 1871 | 39.16528 | -119.722 | 10311300 |
| 1872 | 41.53462 | -117.418 | 10329500 |
| 1873 | 38.92241 | -119.992 | 10336610 |
| 1874 | 39.2963  | -120.205 | 10338000 |
| 1875 | 39.32102 | -120.208 | 10338700 |
| 1876 | 39.42796 | -120.034 | 10346000 |
| 1877 | 39.52435 | -119.995 | 10347310 |
| 1878 | 39.50713 | -119.932 | 10347460 |
| 1879 | 39.53019 | -119.795 | 10348000 |
| 1880 | 39.5688  | -119.727 | 10348245 |
| 1881 | 39.35435 | -119.859 | 10348850 |
| 1882 | 39.37713 | -119.744 | 10349300 |
| 1883 | 39.52047 | -119.701 | 10350000 |
| 1884 | 39.55658 | -119.553 | 10350340 |
| 1885 | 39.63213 | -119.283 | 10351650 |
| 1886 | 32.76505 | -117.169 | 11023000 |
| 1887 | 33.21809 | -117.36  | 11042000 |
| 1888 | 34.40361 | -118.739 | 11109000 |
| 1889 | 34.44166 | -118.927 | 11113000 |
| 1890 | 34.35222 | -119.308 | 11118500 |
| 1891 | 34.89387 | -120.307 | 11140000 |
| 1892 | 35.62858 | -120.684 | 11147500 |
| 1893 | 36.76579 | -121.3   | 11157500 |
| 1894 | 36.90023 | -121.598 | 11159000 |
| 1895 | 36.99134 | -121.956 | 11160000 |
| 1896 | 37.04439 | -122.072 | 11160500 |
| 1897 | 37.32578 | -122.387 | 11162570 |
| 1898 | 37.42327 | -122.189 | 11164500 |
| 1899 | 37.42216 | -121.927 | 11172175 |

|      |          |          |          |
|------|----------|----------|----------|
| 1900 | 37.49744 | -121.774 | 11172945 |
| 1901 | 37.6266  | -121.883 | 11176900 |
| 1902 | 37.58716 | -121.961 | 11179000 |
| 1903 | 37.70493 | -122.044 | 11180900 |
| 1904 | 37.68549 | -122.064 | 11181000 |
| 1905 | 36.21468 | -120.471 | 11224500 |
| 1906 | 37.73131 | -119.559 | 11264500 |
| 1907 | 38.50019 | -121.045 | 11335000 |
| 1908 | 38.72713 | -121.807 | 11452500 |
| 1909 | 38.5113  | -122.456 | 11456000 |
| 1910 | 38.36825 | -122.303 | 11458000 |
| 1911 | 39.02656 | -123.131 | 11462500 |
| 1912 | 38.34325 | -122.702 | 11465660 |
| 1913 | 38.35214 | -122.744 | 11465680 |
| 1914 | 38.42547 | -122.829 | 11465750 |
| 1915 | 38.43658 | -122.725 | 11466200 |
| 1916 | 38.44519 | -122.807 | 11466320 |
| 1917 | 38.50658 | -123.07  | 11467200 |
| 1918 | 40.2182  | -123.633 | 11475000 |
| 1919 | 40.18181 | -123.776 | 11476500 |
| 1920 | 40.49152 | -124.1   | 11477000 |
| 1921 | 40.48042 | -123.891 | 11478500 |
| 1922 | 40.90985 | -124.061 | 11481000 |
| 1923 | 41.29929 | -124.051 | 11482500 |
| 1924 | 41.64069 | -123.015 | 11519500 |
| 1925 | 41.85374 | -123.232 | 11520500 |
| 1926 | 41.04985 | -123.674 | 11530000 |
| 1927 | 41.7915  | -124.076 | 11532500 |
| 1928 | 47.01148 | -123.655 | 12037400 |
| 1929 | 48.05481 | -123.583 | 12045500 |
| 1930 | 48.01426 | -123.133 | 12048000 |
| 1931 | 47.30982 | -123.177 | 12061500 |
| 1932 | 47.02788 | -122.033 | 12094000 |
| 1933 | 47.39371 | -121.955 | 12117500 |
| 1934 | 47.4826  | -122.203 | 12119000 |
| 1935 | 47.83733 | -121.667 | 12134500 |
| 1936 | 47.93482 | -122.073 | 12155300 |
| 1937 | 48.26149 | -122.048 | 12167000 |
| 1938 | 48.84483 | -122.589 | 12213100 |
| 1939 | 45.99467 | -112.536 | 12323240 |
| 1940 | 46.39765 | -112.743 | 12324200 |
| 1941 | 46.71191 | -113.331 | 12331800 |
| 1942 | 46.72234 | -113.683 | 12334510 |
| 1943 | 47.27444 | -116.189 | 12414500 |
| 1944 | 46.25347 | -119.478 | 12510500 |
| 1945 | 43.85028 | -110.518 | 13011500 |
| 1946 | 43.78194 | -111.209 | 13052200 |
| 1947 | 43.92722 | -111.614 | 13055000 |
| 1948 | 43.82583 | -111.905 | 13056500 |
| 1949 | 42.81528 | -111.507 | 13063000 |



|      |          |          |          |
|------|----------|----------|----------|
| 1950 | 42.62472 | -112.088 | 13073000 |
| 1951 | 42.94472 | -112.544 | 13075910 |
| 1952 | 44.00278 | -112.221 | 13112000 |
| 1953 | 44.25917 | -112.41  | 13116500 |
| 1954 | 43.32336 | -114.108 | 13150430 |
| 1955 | 43.66056 | -116.279 | 13206000 |
| 1956 | 44.29083 | -114.472 | 13297355 |
| 1957 | 44.94    | -113.639 | 13305000 |
| 1958 | 46.91528 | -116.951 | 13345000 |
| 1959 | 46.73239 | -117.181 | 13348000 |
| 1960 | 46.02763 | -118.73  | 14018500 |
| 1961 | 45.71958 | -118.323 | 14020000 |
| 1962 | 44.41849 | -118.906 | 14038530 |
| 1963 | 45.6545  | -121.549 | 14120000 |
| 1964 | 45.44901 | -122.245 | 14142500 |
| 1965 | 44.3129  | -123.296 | 14170000 |
| 1966 | 44.78901 | -122.619 | 14183000 |
| 1967 | 44.71207 | -122.77  | 14188800 |
| 1968 | 44.71472 | -123.014 | 14189000 |
| 1969 | 45.4879  | -122.735 | 14206900 |
| 1970 | 45.29984 | -122.354 | 14210000 |
| 1971 | 45.48651 | -122.422 | 14211400 |
| 1972 | 46.61289 | -121.679 | 14226500 |
| 1973 | 46.335   | -122.841 | 14242580 |
| 1974 | 46.27483 | -122.915 | 14243000 |
| 1975 | 45.47594 | -123.725 | 14301500 |
| 1976 | 44.71512 | -123.887 | 14305500 |
| 1977 | 44.06234 | -123.883 | 14307620 |
| 1978 | 42.92345 | -123.429 | 14310000 |
| 1979 | 43.13317 | -123.398 | 14312000 |
| 1980 | 43.27206 | -123.412 | 14319500 |
| 1981 | 42.52485 | -122.843 | 14339000 |
| 1982 | 42.32402 | -122.867 | 14357500 |
| 1983 | 42.43735 | -122.987 | 14359000 |
| 1984 | 42.35401 | -123.407 | 14369500 |
| 1985 | 34.95653 | -81.1062 | 21473426 |
| 1986 | 34.88928 | -81.0687 | 21473428 |
| 1987 | 35.04762 | -81.8557 | 21556525 |
| 1988 | 33.97927 | -84.4522 | 23358685 |
| 1989 | 42.17358 | -75.2794 | 1.42E+08 |
| 1990 | 39.40961 | -76.5573 | 1.58E+08 |
| 1991 | 36.04778 | -76.9842 | 2.08E+08 |
| 1992 | 36.14167 | -78.9192 | 2.09E+08 |
| 1993 | 36.14972 | -78.8967 | 2.09E+08 |
| 1994 | 36.11333 | -78.8597 | 2.09E+08 |
| 1995 | 35.84528 | -78.7244 | 2.09E+08 |
| 1996 | 35.69361 | -78.6922 | 2.09E+08 |
| 1997 | 36.13778 | -79.86   | 2.09E+08 |
| 1998 | 36.12806 | -79.6617 | 2.1E+08  |
| 1999 | 35.87222 | -78.9131 | 2.1E+08  |

|      |          |          |          |
|------|----------|----------|----------|
| 2000 | 35.80694 | -79.5275 | 2.1E+08  |
| 2001 | 35.46778 | -80.7903 | 2.12E+08 |
| 2002 | 35.33278 | -80.7158 | 2.12E+08 |
| 2003 | 35.50389 | -80.7364 | 2.12E+08 |
| 2004 | 35.25639 | -80.7006 | 2.12E+08 |
| 2005 | 35.32167 | -80.5408 | 2.12E+08 |
| 2006 | 35.20833 | -80.58   | 2.12E+08 |
| 2007 | 35.125   | -80.6028 | 2.12E+08 |
| 2008 | 35.38971 | -80.921  | 2.14E+08 |
| 2009 | 35.36139 | -80.8975 | 2.14E+08 |
| 2010 | 35.43417 | -81.03   | 2.14E+08 |
| 2011 | 35.30056 | -80.9728 | 2.14E+08 |
| 2012 | 35.24028 | -80.9744 | 2.14E+08 |
| 2013 | 35.16972 | -80.9878 | 2.14E+08 |
| 2014 | 35.24028 | -80.8683 | 2.15E+08 |
| 2015 | 35.23611 | -80.7711 | 2.15E+08 |
| 2016 | 35.17528 | -80.8308 | 2.15E+08 |
| 2017 | 35.17583 | -80.7192 | 2.15E+08 |
| 2018 | 35.15861 | -80.7133 | 2.15E+08 |
| 2019 | 35.105   | -80.9536 | 2.15E+08 |
| 2020 | 35.42667 | -82.9197 | 3.46E+08 |
| 2021 | 35.43833 | -83.9189 | 3.52E+08 |
